# Supplementary material for: Factors influencing response to Botulinum toxin type A in patients with idiopathic cervical dystonia: results from an international observational study
Source: PubMed Central journal article supplement — BMJ Open. 2012 Jun 14;2(3):e000881. doi: 10.1136/bmjopen-2012-000881 (PMC3378940; doi:10.1136/bmjopen-2012-000881), 2012-06-14
Supplement: bmjopen-2012-000881.draft_revisions.pdf [file bmjopen-2012-000881.draft_revisions.pdf]

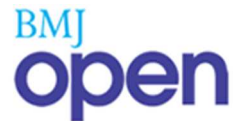

**Factors influencing response to Botulinum toxin type A in patients with idiopathic cervical dystonia: Results from an international, observational study**

|                                 |                                                                                                                                                                                                                                                                                                                                                                                                                         |
|---------------------------------|-------------------------------------------------------------------------------------------------------------------------------------------------------------------------------------------------------------------------------------------------------------------------------------------------------------------------------------------------------------------------------------------------------------------------|
| Journal:                        | <i>BMJ Open</i>                                                                                                                                                                                                                                                                                                                                                                                                         |
| Manuscript ID:                  | bmjopen-2012-000881                                                                                                                                                                                                                                                                                                                                                                                                     |
| Article Type:                   | Research                                                                                                                                                                                                                                                                                                                                                                                                                |
| Date Submitted by the Author:   | 16-Jan-2012                                                                                                                                                                                                                                                                                                                                                                                                             |
| Complete List of Authors:       | Misra, Vijay; The National Hospital for Neurology & Neurosurgery, Ehler, Edvard; County Hospital Pardubice, Department of Neurology Zakine, Benjamin; Ipsen Pharma, Global medical Affairs Maisonobe, Pascal; Ipsen Pharma, Biostatistics & Data Management Simonetta-Moreau, Marion; IPôle Neurosciences, Hôpitaux de Toulouse, Pavillon Riser & INSERM U825, Pavillon Baudot Purpan Hospital, Department of Neurology |
| <b>Primary Subject Heading</b>: | Neurology                                                                                                                                                                                                                                                                                                                                                                                                               |
| Secondary Subject Heading:      | Neurology                                                                                                                                                                                                                                                                                                                                                                                                               |
| Keywords:                       | Neuromuscular disease < NEUROLOGY, Adult neurology < NEUROLOGY, Neurological pain < NEUROLOGY                                                                                                                                                                                                                                                                                                                           |
|                                 |                                                                                                                                                                                                                                                                                                                                                                                                                         |

SCHOLARONE™  
Manuscripts

1  
2  
3 **Article type:** Full Paper  
4  
5

6 **PROPOSED TITLE:** Factors influencing response to Botulinum toxin type A in patients with  
7 idiopathic cervical dystonia: Results from an international, observational study  
8  
9

10  
11 **Authors:** Vijay P. Misra<sup>1</sup>, Edvard Ehler<sup>2</sup>, Benjamin Zakine<sup>3</sup>, Pascal Maisonobe<sup>4</sup> and Marion  
12 Simonetta-Moreau<sup>5</sup> on behalf of the INTEREST IN CD group  
13  
14

15  
16 **Affiliations:** <sup>1</sup>Department of Neurology, The National Hospital for Neurology & Neurosurgery,  
17 Queen Square, London WC1N 3BG, UK; <sup>2</sup>Department of Neurology, County Hospital  
18 Pardubice, Kyjevská 44, CZ 532 03 Pardubice, Czech Republic; <sup>3</sup>Global Medical Affairs,  
19 Ipsen Pharma, 65 Quai Georges Gorse, Boulogne-Billancourt 92100, France; <sup>4</sup>Biostatistics &  
20 Data Management, Ipsen Pharma, 65 Quai Georges Gorse, Boulogne-Billancourt 92100,  
21 France; <sup>5</sup>Department of Neurology, IPôle Neurosciences, Hôpitaux de Toulouse, Pavillon  
22 Riser & INSERM U825, Pavillon Baudot Purpan Hospital, place du Dr Baylac, Toulouse, F-  
23 31059 France  
24  
25  
26  
27  
28  
29

30  
31 **Corresponding author:** Vijay P. Misra  
32  
33

34 **Contact address:**

35 The National Hospital for Neurology & Neurosurgery  
36 Queen Square  
37 London, WC1N 3BG, UK  
38

39 **Tel:** +44 207 483 5017

40 **Fax:** +44 207 483 5217

41 **E-mail:** peter.misra@virgin.net  
42  
43  
44  
45

46  
47 **Email addresses for all authors:**

48 Vijay P. Misra: [peter.misra@virgin.net](mailto:peter.misra@virgin.net)

49 Edvard Ehler: [eda.ehler@tiscali.cz](mailto:eda.ehler@tiscali.cz)

50 Benjamin Zakine: [benjamin.zakine@ipsen.com](mailto:benjamin.zakine@ipsen.com)

51 Pascal Maisonobe: [pascal.maisonobe@ipsen.com](mailto:pascal.maisonobe@ipsen.com)

52 Marion Simonetta-Moreau: [simonetta.m@chu-toulouse.fr](mailto:simonetta.m@chu-toulouse.fr)  
53  
54  
55  
56  
57  
58

59 **Key words:** idiopathic cervical dystonia, botulinum toxin  
60

**Previous publications:**

1. Poster presentation, “An International, Observational Study To Define Factors Influencing Response to Botulinum Toxin Type A (BoNT-A) in Subjects with Idiopathic Cervical Dystonia: Methodology and Baseline Clinical Data” at the 63rd Annual Meeting of the American Academy of Neurology, Honolulu, Hawaii, 9–16 April 2011. Abstract number P04.224.
2. Poster presentation, “An international, observational study to define in real life practice response to Botulinum toxin type A (BoNT-A) injection in subjects with idiopathic cervical dystonia” at The MDS 15th International Congress of Parkinson's Disease and Movement Disorders, Toronto, ON, Canada, 5–9 June 2011. Abstract number 662.
3. Poster presentation, “An international, observational study to identify in real life practice prognostic factors for response to Botulinum toxin type A injection in subjects with cervical dystonia” at the 15<sup>th</sup> Congress of the European Federation of Neurological Societies, Budapest, Hungary, 10–13 September 2011. Abstract number P1497.
4. Poster presentation, “An international, observational study to define in real life practice response to Botulinum toxin type A (BoNT-A) injection in subjects with idiopathic cervical dystonia” at the 7<sup>th</sup> International Conference on Basic and Therapeutic Aspects of Botulinum and Tetanus Toxins – Toxins 2011, Santa Fe, USA, 2–5 October 2011.

**Word count (abstract)/limit:** 274/300 words

**Word count (text)/limit:** 3138/4000 words exclusive of title page, abstract, figures/tables, and references

**Figures/tables/limit:** 5/5 figures and/or tables

**References/limit:** 18/40

**Copyright statement**

“The Corresponding Author has the right to grant on behalf of all authors and does grant on behalf of all authors, an exclusive licence (or non-exclusive for UK Crown Employees) on a worldwide basis to the BMJ Publishing Group Ltd, and its Licensees to permit this article (if accepted) to be published in *BMJ Open* and any other BMJ PGL products and to exploit all subsidiary rights, as set out in our licence.”

**ABSTRACT:**

*Objectives:* Real-life data on response to Botulinum toxin A (BoNT-A) in cervical dystonia (CD) are sparse. An expert group of neurologists was convened with the overall aim to develop a definition of treatment response, which could be applied in a non-interventional study of BoNT-A-treated subjects with CD.

*Design:* International, multicentre, prospective, observational study of a single injection cycle of BoNT-A as part of normal clinical practice.

*Setting:* 38 centres across Australia, Belgium, Czech Republic, France, Germany, The Netherlands, Portugal, Russia and the United Kingdom.

*Participants:* 404 adult subjects with idiopathic CD. Most subjects were female, aged 41–60 years, and had previously received BoNT-A.

*Outcome measures:* Response was assessed according to a multidimensional definition based on four criteria: magnitude of effect ( $\geq 25\%$  improvement Toronto Western Spasmodic Torticollis Rating Scale), duration of effect ( $\geq 12$ -week interval between the BoNT-A injection day and subject-reported waning of treatment effect), tolerability (absence of severe related adverse event), and subject's positive clinical global improvement (CGI).

*Results:* High rates of response were observed for magnitude of effect (73.6%), tolerability (97.5%), and subject's CGI (69.8%). The subjective duration of effect criterion was achieved by 49.3% of subjects; 28.6% of subjects achieved the responder definition. Factors most strongly associated to response were age ( $< 40$  years; odds ratio 3.9,  $p < 0.05$ ) and absence of baseline head tremor (odds ratio 1.5; not significant).

*Conclusions:* Three of four criteria were met by most patients. The proposed multidimensional definition of response appears to be practical for routine practice. Unrealistically high patient expectation and subjectivity may influence the perception of a quick waning of effect, but highlights that this aspect may be a hurdle to response in some patients.

**Clinical trials information:** (NCT00833196; [clinicaltrials.gov](http://clinicaltrials.gov))

**ARTICLE SUMMARY****Article focus:**

- Development and application of a novel multimodal definition of treatment response in a non-interventional study of patients with cervical dystonia (CD) administered Botulinum toxin A (BoNT-A) in routine clinical practice.

**Key messages:** For peer review only - <http://bmjopen.bmj.com/site/about/guidelines.xhtml>

- Magnitude of effect, subject satisfaction and safety profile are appropriate measures of BoNT-A response in patients with CD.
- A multidimensional definition of response enables comprehensive evaluation of treatment response that is not achievable with a single measurement criterion.

**Strengths and limitations of this study:**

- This is a large-scale study of CD patient demographics and BoNT-A response in a real-life clinical setting.
- The subjective nature of self-reported waning of treatment effect is potentially vulnerable to bias as a result of high patient expectation, which constrains its use as part of the challenging multidimensional definition of response.

## INTRODUCTION

Cervical dystonia (CD) is the most common of the focal dystonias,[1] with a prevalence ranging from 57 per million of the population of some European countries [2] to 89 per million in parts of the US (Rochester, Minnesota).[3] Any muscle in the neck may be abnormally contracted in CD. Sets of contracted muscles can be found in isolation, but are most commonly found in combination.[4] The majority of cases (~66%) present with rotational torticollis and laterocollis.[5] Co-morbidity with other movement disorders is common; therefore, classification of CD is based on the primary (idiopathic) or secondary aetiology.

Botulinum toxin A (BoNT-A) is a neurotoxin that is isolated and purified from *Clostridium botulinum* type A bacteria and has gained increasing acceptance as a first-line treatment option for CD. There is a substantial body of evidence from clinical studies to support the use of BoNT-A in patients with CD.[6-8] There are currently three major commercially available preparations of Type A toxins: abobotulinumtoxinA (Dysport<sup>®</sup>, Ipsen), onabotulinumtoxinA (Botox<sup>®</sup>, Allergan Incorporated) and incobotulinumtoxinA (Xeomin<sup>®</sup>, Merz Pharmaceuticals GmbH), which differ in their potency; thus, the units of each preparation are not directly interchangeable.

Although the efficacy and safety of BoNT-A is widely accepted according to robust and well-designed clinical trials; these studies assessed efficacy using mainly Toronto Western Spasmodic Torticollis Rating Scale (TWSTRS) or Tsui scale in highly selected patients, which may not relate to real-life practice with individualised patients. Furthermore, the administration of BoNT-A in practice does not reflect the standardised methods adopted in clinical studies because injection schemes are individually determined by the physician. Moreover, BoNT-A administration protocols for CD are not standardised to the subtypes of the condition (i.e. predominant and secondary components for head and neck deviations).

In clinical practice, assessment of BoNT-A effectiveness is multidimensional and cannot be limited to TWSTRS or Tsui scale only, but data on efficacy and safety of BoNT-A in real-world settings are lacking. There is, therefore, a clinical need to pragmatically describe the management of CD subtypes innovatively, taking into account several dimensions of interest for physicians, such as patient's satisfaction, and to establish a robust definition of response to BoNT-A treatment in the real-life management of patients with CD. A meeting of experienced neurologists from France, Germany, Italy, Russia, Spain, Thailand and the United Kingdom was convened in 2008, with a view to reaching a consensus on a definition of treatment response, a definition currently lacking in the clinical management of patients with CD receiving BoNT-A. The expert group identified the most relevant predominant and secondary components for head and neck deviations and concurred in proposing a new multidimensional definition of response, which was based on combined aspects of efficacy and tolerability and assessment of global improvement. We present,

1  
2  
3 herein, findings from the application of this novel definition of treatment response in a non-  
4 interventional study of subjects with CD who were administered BoNT-A. In this study, the  
5 primary objective was to estimate the responder rate following one BoNT-A injection cycle  
6 administered via routine practice.  
7  
8  
9  
10  
11  
12  
13  
14  
15  
16  
17  
18  
19  
20  
21  
22  
23  
24  
25  
26  
27  
28  
29  
30  
31  
32  
33  
34  
35  
36  
37  
38  
39  
40  
41  
42  
43  
44  
45  
46  
47  
48  
49  
50  
51  
52  
53  
54  
55  
56  
57  
58  
59  
60

## SUBJECTS AND METHODS

### Study design

This was an international, multicentre, observational, prospective, longitudinal study. Informed consent was obtained prior to subject enrolment and prior to any data collection. Independent Ethics Committee (IEC)/Institutional Review Board (IRB) approval in each country was obtained prior to study initiation.

### Study population

This study enrolled subjects  $\geq 18$  years old, suffering from idiopathic CD with a TWSTRS severity score  $\geq 15$ ,<sup>[9]</sup> and a  $\geq 12$ -week interval between the last injection (BoNT-A or BoNT-B) and the first study visit.

Subjects with secondary CD were excluded from the study, as were subjects with contraindications of BoNT-A treatment.

### Study treatment

The decision to prescribe a BoNT-A preparation was taken prior to, and independently from, the decision to enrol the subject in the study. In order to avoid bias in the recruitment of subjects, physicians were not allowed to choose their subjects, but were asked to include consecutive subjects during BoNT-A consultations.

The prescribing of BoNT-A was made in accordance with routine clinical practice and investigators were free to choose: the targeted muscles from the clinically indicated neck muscles; BoNT-A preparation; and injected dose number of points and volume per point. Subjects received a single injection cycle as part of normal clinical practice. Concomitant therapy was permitted throughout the study.

### Study assessments

Subjects were assessed during their usual centre visits at the inclusion visit (Visit 1; week 0); follow-up visit (Visit 2; 3–6 weeks after injection); and end-of-study visit (Visit 3; 12–16 weeks after injection). Efficacy assessments encompassed clinical assessment; assessment of CD using the TWSTRS total score (recorded at all visits);<sup>[10]</sup> assessment of tremor using the Tsui Tremor subscale (recorded at all visits);<sup>[11]</sup> assessment of Clinical Global Improvement (CGI) by both Investigator and subject (recorded at Visit 2); and CD Impact Profile-58 (CDIP-58) (recorded at Visits 1 and 2).<sup>[12]</sup> The CDIP-58 comprises a 16-item health-related quality of life (HRQoL) questionnaire encompassing domains relating to head and neck symptoms experienced by the subject, impact on usual daily activities, physical activities, sleep, social activities, and emotions/psychosocial functioning. Scores for items within domains were



1  
2  
3 summarised into eight subscale scores, each ranging from 0 to 100 (higher scores indicate  
4 worse health).

5  
6 The primary endpoint of this study was the percentage of responders after one BoNT-  
7 A injection cycle. Response was defined using the ambitious hypothesis for a  
8 multidimensional definition of response developed by experienced neurologists, whereby  
9 subjects were classified as a responder if they met all of the following criteria: 1) magnitude  
10 of effect:  $\geq 25\%$  improvement on TWSTRS severity scale at Visit 2 (peak effect) or Visit 3 (if  
11 Visit 2 was not performed), compared with Visit 1, as reported by Truong et al. in 2005;<sup>[9]</sup> 2)  
12 duration of effect:  $\geq 12$ -week interval between the BoNT-A study injection day and the day the  
13 subject reports a clinically relevant waning of treatment effect, justifying a re-injection cycle  
14 as reported by Ranoux et al. in 2002;<sup>[13]</sup> 3) good tolerance: no treatment-related severe  
15 adverse event (AE) reported during the study; and 4) Subject-rated CGI score at Visit 2 and  
16 Visit 3 equal to either +2 (much improved) or +3 (very much improved).

17  
18 Secondary efficacy outcomes included improvements in TWSTRS total and Severity,  
19 Disability and Pain subscale scores, tremor (as measured by TSUI score) and CDIP-58.

20  
21 Only AEs considered by the Investigator to be related to study drug were collected  
22 during this study, which is in line with current clinical practice. Investigators were asked to  
23 report, to the safety department of the BoNT-A manufacturer, any adverse drug reactions  
24 using the usual process for such reactions. More specifically on Visits 2 and 3, investigators  
25 were also requested to document the occurrence and intensity (severe or not) of dysphonia,  
26 dysphagia, neck muscle weakness and other.

### 27 28 29 30 31 32 33 34 35 36 37 38 39 **Study size**

40 The sample size was determined based on both the primary and exploratory objectives.  
41 Considering an anticipated rate of responder of 50%, using an estimate for this proportion  
42 with a precision of 5%, the required sample size was determined to be 385 subjects  
43 (assuming a two-sided 95% confidence interval [CI]). When considering the objective related  
44 to the detection of prognostic factors (assuming Alpha=5%, Power=80%), in order to ensure  
45 the ability to detect odds ratio  $\geq 2$  and a probability to be exposed to any given level of a  
46 prognostic factor larger or equal to 1/3 (=imbalance), the required sample size is 366  
47 subjects. Thus in order to ensure 385 evaluable subjects, 400 subjects were included in this  
48 study.

### 49 50 51 52 53 54 55 56 57 **Statistical analyses**

58 The safety population consisted of all subjects who received one BoNT-A injection, whereas  
59 the efficacy population comprised all subjects in the treated population for whom there were  
60 data for each of the four underlying variables for response. The responder analysis was

1  
2  
3 performed using the efficacy population and all secondary endpoints were assessed using  
4 the safety population.  
5

6 The primary endpoint was summarised overall, and by each of the four criteria, as the  
7 percentage of responders as a point estimate and its associated 95% CI. Responder  
8 subgroup analyses were also performed to investigate response based on the following  
9 criteria: predominant component of head/neck rotation; BoNT-A preparations; duration of CD;  
10 previous BoNT-A use; dystonia localisation (head/neck, trunk, limbs); presence of tremor  
11 based on the TSUI scale; use of electromyography (EMG); and use of concomitant therapies  
12 at baseline.  
13  
14  
15  
16  
17

18 As an exploratory analysis, a stepwise multivariate logistic regression analysis was  
19 performed on the efficacy population to assess prognostic factors for response using  
20 subgroup variables, as well as additional demographic and disease characteristics variables.  
21 Odds ratios (OR) with 95% CI estimated by the logistic model were calculated using the  
22 primary criteria; a lower 95% CI bound >1 indicated a significantly increased chance of being  
23 a responder.  
24  
25  
26

27 No estimations were made for missing data and there was no controlling for  
28 confounding factors.  
29  
30  
31  
32  
33  
34  
35  
36  
37  
38  
39  
40  
41  
42  
43  
44  
45  
46  
47  
48  
49  
50  
51  
52  
53  
54  
55  
56  
57  
58  
59  
60

## RESULTS

### Subject population

Between 19 February 2009 and 12 February 2010, 404 subjects from 38 centres in 9 countries (Australia, Belgium, Czech Republic, France, Germany, The Netherlands, Portugal, Russia and the United Kingdom) were enrolled and followed in this study. A total of 379 subjects (93.8%) completed the study. The most common reason for not completing the study was loss to follow-up (3.2%; n=13); no subjects discontinued due to lack of efficacy.

The safety population included all subjects treated with BoNT-A (n=404), whereas the efficacy population included all subjects treated with BoNT-A for whom data were available for each of the four criteria for the primary endpoint (n=367).

Baseline demographic and disease characteristics are shown in Table 1. The majority of subjects were female (64.9%), aged 41–60 years (52.5%), and had suffered from CD for >1 year (90.9%). Nearly all of the subjects had sporadic CD (94.8%), and focal dystonia predominated (91.6%). In the few cases of segmental/multifocal dystonias, the upper limb was the most frequently impaired segment. The most common predominant component of CD was rotation (72.8%), followed by laterocollis (14.1%). The majority of subjects had secondary components (83.9%).

**Table 1: Subject demographics and CD characteristics (safety population)**

| Demographic/characteristic           | Total, n=404        |            |
|--------------------------------------|---------------------|------------|
| Gender, n (%)                        | Male                | 142 (35.1) |
|                                      | Female              | 262 (64.9) |
| Age (years), n (%)                   | 18 to 30            | 18 (4.5)   |
|                                      | 31 to 40            | 52 (12.9)  |
|                                      | 41 to 50            | 105 (26.0) |
|                                      | 51 to 60            | 107 (26.5) |
|                                      | 61 to 70            | 81 (20.0)  |
|                                      | >70                 | 41 (10.1)  |
| Body weight (kg), mean (SD)          | 72.8 (14.9)         |            |
| Duration of cervical dystonia, n (%) | <6 months           | 10 (2.5)   |
|                                      | 6 months to <1 year | 27 (6.7)   |
|                                      | 1 to 5 years        | 140 (34.7) |
|                                      | 6 to 10 years       | 89 (22.0)  |
|                                      | 11 to 20 years      | 84 (20.8)  |
|                                      | >20 years           | 54 (13.4)  |
| Type of cervical dystonia, n (%)     | Sporadic            | 383 (94.8) |
|                                      | Familial            | 21 (5.2)   |
| Location type, n (%)                 | Focal               | 370 (91.6) |
|                                      | Segmental           | 20 (5.0)   |
|                                      | Multi-focal         | 9 (2.2)    |

|                                                                           |                                 |                 |
|---------------------------------------------------------------------------|---------------------------------|-----------------|
|                                                                           | Generalised                     | 5 (1.2)         |
| Localisation, n (%)                                                       | Head/neck                       | 404 (100.0)     |
|                                                                           | Trunk                           | 13 (3.2)        |
|                                                                           | Upper limb                      | 29 (7.2)        |
|                                                                           | Lower limb                      | 6 (1.5)         |
| Predominant component, n (%)                                              | Rotation                        | 294 (72.8)      |
|                                                                           | Laterocollis                    | 57 (14.1)       |
|                                                                           | Tremor                          | 20 (5.0)        |
|                                                                           | Retrocollis                     | 12 (3.0)        |
|                                                                           | Shoulder elevation              | 8 (2.0)         |
|                                                                           | Anterocollis                    | 4 (1.0)         |
|                                                                           | Jerk                            | 4 (1.0)         |
|                                                                           | Lateral shift of column         | 3 (0.7)         |
|                                                                           | Sagittal shift of column        | 2 (0.5)         |
| Secondary components present, n (%)                                       | Yes                             | 339 (83.9)      |
| Most frequent combinations of predominant and secondary components, n (%) | Rotation and laterocollis       | 161 (39.9)      |
|                                                                           | Rotation and shoulder elevation | 143 (35.4)      |
|                                                                           | Rotation and tremor             | 73 (18.1)       |
| TWSTRS score at baseline, mean $\pm$ SD                                   | Severity subscale               | 19.5 $\pm$ 3.8  |
|                                                                           | Disability subscale             | 10.6 $\pm$ 5.9  |
|                                                                           | Pain subscale                   | 6.6 $\pm$ 4.9   |
|                                                                           | Total score                     | 36.8 $\pm$ 10.7 |
| Baseline tremor present                                                   | n (%)                           | 191 (47.3)      |
| CDIP-58 subscales scores <sup>a</sup> , mean $\pm$ SD                     | Head and neck symptoms          | 50.6 $\pm$ 25.2 |
|                                                                           | Pain and discomfort             | 31.8 $\pm$ 27.8 |
|                                                                           | Upper limb activities           | 26.1 $\pm$ 24.6 |
|                                                                           | Walking                         | 22.4 $\pm$ 26.7 |
|                                                                           | Sleep                           | 23.0 $\pm$ 31.0 |
|                                                                           | Annoyance                       | 26.4 $\pm$ 27.7 |
|                                                                           | Mood                            | 21.6 $\pm$ 25.9 |
|                                                                           | Psychosocial                    | 30.7 $\pm$ 28.2 |

<sup>a</sup>CDIP-58 n=99 (questionnaire in English, thus completed by English speaking patients only).

## Treatment history

Most subjects had previously received a BoNT-A injection (84.9%). Of the safety population, more than half of subjects (n=215; 53.2%) had previously received benzodiazepines for the treatment of CD and approximately one-third (29.7%) continued to receive these agents after BoNT-A treatment. Prior physical therapy was reported in 49.8% of subjects, but only 14.6% of subjects were receiving physical therapy at the inclusion visit. Analgesics had been previously taken by 40.8% of subjects, with 18.3% of subjects receiving analgesics at the inclusion visit.

## Injection schemes

Physicians prescribed three BoNT-A preparations: Dysport (n=279, 69%), Botox (n=113, 28%) and Xeomin (n=12, 3%), independently from study enrolment, as per local clinical practice at the center. Subjects received Dysport and Botox at median doses of 500 and 160 units, respectively. Overall, the median number of injected muscles was four; of which, the most frequently injected muscles in both the Dysport and Botox groups were the splenius capitis, sternocleidomastoid and trapezius. The number of patients treated with Xeomin was too small for a meaningful analysis. Investigators used EMG during administration of at least one muscle in 185 subjects (46.0%).

## Efficacy

### *Responder analysis*

The percentage of subjects meeting the response criteria, as well as each of the individual response criteria, is shown in Figure 1. Three criteria out of four were achieved in the majority of patients, as shown by 97.5%, 73.6% and 69.8% of subjects achieving criterion of magnitude of effect, tolerance (absence of severe related AEs) and subject's CGI, respectively. A total of 49.3% of subjects achieved response based on the duration of effect criterion ( $\geq 12$  weeks between inclusion and subject-rated waning of treatment effect). Overall, 28.6% (95% CI: 24.0% to 33.5%) of subjects were classified as responders to treatment. Evaluation of response by TWSTRS, tolerance and CGI improvement alone (i.e. exclusion of duration of effect) established 58.3% (95% CI: 53.1% to 63.4%) of subjects as responders.

### *Responder subgroup analysis*

Analysis of the response criteria by subgroup is shown in Figure 2 and showed that there were variations in response, albeit these results were not statistically significant. Data revealed that more subjects responded among subgroups presenting with laterocollis (41.7% versus 26.7% with rotation), without baseline tremor (33.2% versus 23.7% with tremor), and

those not receiving concomitant medication at baseline (35.1% versus 22.8% receiving baseline concomitant medications).

### Prognostic factors associated with response

The multivariate logistic regression showed that the most strongly associated factors to response were age (<40 years) and absence of baseline head tremor: corresponding ORs were 3.9 ( $p < 0.05$ ) for age and 1.5 (not significant) for absence of tremor. Additional trends with a lower magnitude of association were observed (data not shown).

### Secondary efficacy outcomes

Secondary efficacy outcomes are shown in Table 2. Subjects reported a notable improvement in TWSTRS total score and subscale scores over the course of treatment, as indicated by the percentage change in scores at each visit. Sixty-six of the 181 subjects (36.5%) with baseline tremor no longer presented with tremor at Visit 2. HRQoL improved following BoNT-A treatment, as demonstrated by decreases in all eight subscores of the CDIP-58 at Visit 2.

**Table 2. Efficacy outcomes**

|                                                                        | Visit 2                    | Visit 3                    |
|------------------------------------------------------------------------|----------------------------|----------------------------|
| Percentage change in TWSTRS Score, mean $\pm$ SD                       | (n=374)                    | (n=380)                    |
| Severity subscore                                                      | -40.8 $\pm$ 25.1           | -16.5 $\pm$ 22.3           |
| Disability subscore                                                    | -36.3 $\pm$ 49.8           | -6.6 $\pm$ 90.2            |
| Pain subscore                                                          | -35.8 $\pm$ 49.9           | -7.6 $\pm$ 72.6            |
| Total score                                                            | -39.6 $\pm$ 26.6           | -15.4 $\pm$ 27.0           |
| Tremor                                                                 | (n=375)                    | (n=380)                    |
| Subjects with improvement in tremor <sup>a</sup> with treatment, n (%) | 66/181 <sup>b</sup> (36.5) | 41/178 <sup>a</sup> (23.0) |
| CDIP-58 subscales scores, mean $\pm$ SD                                | (n=93 <sup>c</sup> )       | —                          |
| Head and neck symptoms                                                 | 26.1 $\pm$ 21.9            | —                          |
| Pain and discomfort                                                    | 20.5 $\pm$ 23.5            | —                          |
| Upper limb activities                                                  | 16.3 $\pm$ 19.9            | —                          |
| Walking                                                                | 15.3 $\pm$ 21.5            | —                          |
| Sleep                                                                  | 12.3 $\pm$ 20.0            | —                          |
| Annoyance                                                              | 15.6 $\pm$ 23.9            | —                          |
| Mood                                                                   | 13.9 $\pm$ 20.5            | —                          |
| Psychosocial functioning                                               | 14.2 $\pm$ 23.6            | —                          |

1  
2  
3 <sup>a</sup>Improvement defined by presence of tremor at baseline and absence of tremor at  
4 subsequent visits.

5  
6 <sup>b</sup>Subjects with data available at this timepoint and with tremor present at baseline.

7  
8 <sup>c</sup>Questionnaire in English, thus completed by English speaking patients only.  
9

### 10 11 **Safety and tolerability**

12  
13 A total of 88 treatment-related AEs were reported during the study. Overall, 68 subjects  
14 (16.8%) experienced at least one treatment-related AE. Of the observed AEs, dysphagia was  
15 the most commonly reported (9.2%). Overall, ten treatment-related AEs were considered to  
16 be severe, with neck muscle weakness (n=4) being observed as the most common AE at this  
17 grade of severity. The incidence of AEs (severe and not severe) and dysphagia did not  
18 statistically differ between BoNT-A preparations (Figure 3).  
19  
20  
21  
22  
23  
24  
25  
26  
27  
28  
29  
30  
31  
32  
33  
34  
35  
36  
37  
38  
39  
40  
41  
42  
43  
44  
45  
46  
47  
48  
49  
50  
51  
52  
53  
54  
55  
56  
57  
58  
59  
60

## DISCUSSION

In this non-interventional study of subjects with CD in routine practice, the majority of subjects were middle-aged women. These demographic data were in accordance with a typical population of subjects with CD.[14] TWSTRS and CDIP-58 scores at baseline reflected a population with moderate to severe CD severity.

Real-life data on response to BoNT-A in CD are sparse. Therefore, the primary objective of this study was to estimate the rate of response following one BoNT-A injection cycle in real-life practice using a challenging multidimensional definition developed by an expert group of neurologists. To our knowledge, this is the first such non-interventional study to apply a consensus-based multimodal definition of response to a large real-world population of patients with CD treated with BoNT-A. Notably, this ambitious definition for response was achieved by almost one-third (approximately 30%) of the 404 subjects who participated in this study. Although the magnitude of effect and subject satisfaction were both high and the number of treatment-related severe AEs was very low, the number of subjects with a duration of effect  $\geq 12$  weeks was relatively low. These novel findings indicate that measurements for the magnitude of effect, subject satisfaction and safety profile according to routine practice demonstrate good clinical response to BoNT-A in subjects suffering from CD. However, duration of effect such as defined in the study may require further confirmation due to its subjective nature. Waning of effect is a gradual process and therefore assessment for duration of effect based on serial subject's CGI measurements (rather than depending on the patient reporting on waning of effect on a single specific date) may have been more appropriate. Regardless of these considerations, unrealistically high patient expectation and subjectivity may influence the perception of quick waning of effect. This highlights that, for some patients, this aspect is seen as a hurdle to response.

The subgroup analyses suggest that laterocollis as a predominant component, the absence of baseline tremor and absence of concomitant medication are factors that may be associated with higher response rates. Even if these data were not statistically significant, they provide a good starting point for further evaluation. In particular, it would be interesting to establish whether the use of concomitant medication at baseline reflects a greater disease severity (as assessed with TWSTRS scores) or more co-morbidities associated with CD (e.g. anxiety, depression) that could interfere with the therapeutic effect of BoNT-A. With relevance to the former, data from this study suggest that the duration of CD ( $\leq 10$  years versus  $> 10$  years) did not markedly influence the distribution of concomitant therapies (data not shown).

Efficacy findings confirm the value of BoNT-A as a treatment for CD symptoms. Notable improvements in mean TWSTRS scores were observed, as was improvement in tremor. It is recognised that HRQoL is compromised in CD, especially among women.[15] In



1  
2  
3 this analysis of a largely female population, the decrease in subscores of the CDIP-58 (a  
4 more sensitive measure of clinical change than other frequently used HRQoL instruments[12]  
5 is consistent with previous reports in confirming the positive impact of BoNT-A on HRQoL  
6 when administered as a therapy for CD.[15, 16]  
7  
8

9  
10 BoNT-A was generally well tolerated in this study, with few reported severe AEs. In  
11 general, treatment-emergent side effects were consistent with the known safety profile of this  
12 treatment.[17] As observed in previous reports, the most common side effect of BoNT-A  
13 treatment was dysphagia.[17, 18] Overall, this study highlights that no new safety concerns  
14 were raised with BoNT-A when used in routine clinical practice. For any given treatment, an  
15 acceptable level of tolerance is required to ensure continued treatment and subject  
16 compliance; hence the inclusion of tolerance as a response criterion. In total, 97.5% of  
17 subjects met the response criterion of no severe treatment-related AEs. It may be speculated  
18 that the presence of treatment-emergent side effects such as dysphagia could exert a  
19 negative impact on objective and subjective assessments of symptom improvement and  
20 ultimately response, but observed response rates of 73.6% (magnitude of effect) and 69.8%  
21 (subject's CGI) in this study would suggest otherwise.  
22  
23

24  
25  
26  
27  
28  
29 Inherent to studies of this design, the non-interventional nature of the study means  
30 that confirmatory conclusions cannot be drawn. Moreover, the *a priori* defined duration of  
31 effect criteria was based on subject assessment of the waning of treatment effect. Thus, the  
32 subjective nature of this assessment has potential for bias resulting from patients'  
33 unrealistically high expectations from treatment; a hypothesis supported by the observation  
34 of maintained improvements in TWSTRS scores even at Visit 3.  
35  
36  
37  
38  
39

## 40 CONCLUSIONS

41  
42 This study reveals the CD subject demographics and BoNT-A response in a real-life clinical  
43 setting. Using a novel multimodal definition of response, this large-scale study showed that  
44 the magnitude of effect, subject satisfaction and safety profile were well met and it was also  
45 felt that these were appropriate measures to assess BoNT-A response in CD subjects. The  
46 date of waning of treatment effect, as perceived by the subject on a specific day, is probably  
47 too subjective to be clinically appropriate enough to be used as part of this challenging  
48 multidimensional response definition, serial subject's CGI may be a better measure to give a  
49 more appropriate indication of duration of action. A multidimensional definition of response  
50 does, however, allow a comprehensive assessment of the patient's response to treatment,  
51 which cannot be achieved by using a single criterion. This study also indicates possible  
52 predictive factors for BoNT-A in subjects with CD, but further research is required to confirm  
53 these in the prognosis of CD.  
54  
55  
56  
57  
58  
59  
60

**Acknowledgments:** The authors would like to acknowledge the editorial assistance of Ogilvy Healthworld. Funding was provided by Ipsen.

The authors would also like to thank members of the INTEREST IN CD study group, who were:

Australia: Dr A Hughes, Dr K Kotschet, Dr D Williams, Dr V Fung; Belgium: Dr M van Zandijcke, Dr P Santens, Dr W van Landegem, Dr V Delvaux; Czech Rep: Dr E Ehler, Dr R Jech, Dr P Otruba, Dr M Bareš; France: Dr M Simonetta-Moreau, Dr S Soulayrol, Dr P M Burbaud, Dr A Kreisler, Dr C Vial, Dr M Borg, Dr S Sangla, Dr N Patte-Karsenti; Germany: Dr E Fleischer, Dr M Müngersdorf, Dr I Weimar, Dr R Pfister, Dr B Mohammadi, Dr I Nastos; Netherlands: Dr Laboyrie, Dr Douma; Portugal: Dr M J Rosas, Dr J Ferreira, Dr M Castelo Branco; Russia: Dr S Timerbaeva, Dr D Khasanova, Dr L Korenko, Dr G Belskaya; UK: Dr P Moore, Dr M Kellet, Dr P Misra, Dr T Harrower.

### Competing interests

*Vijay P. Misra*

Consultancies: *Ad hoc* consultant to Ipsen Pharma and Syntaxin Ltd..

Advisory Boards: Attended Ipsen Pharma Medical Advisory Boards.

Contracts: Contracts with Ipsen Pharma and Syntaxin Ltd. related to *ad hoc* Consultancies/Advisory boards.

*Edvard Ehler*

Grants: IGA Ministry of Health, Czech Republic.

*Benjamin Zakine and Pascal Maisonobe*

Employment: Ipsen.

*Marion Simonetta-Moreau*

Consultancies: Ipsen.

Employment: Hôpitaux de Toulouse and Paul Sabatier University.

### Funding statement

This study was supported by Ipsen Pharma; employees (Benjamin Zakine and Pascal Maisonobe) of whom were involved in the design of the study and the subsequent preparation of this manuscript (writing and review).

### Contributor statement

For peer review only - <http://bmjopen.bmj.com/site/about/guidelines.xhtml>

1  
2  
3 Vijay P. Misra was involved in the concept and design, provision of study materials or  
4 patients, collection and assembly of data, data analysis and interpretation, manuscript review  
5 and critique, and final approval of manuscript.  
6  
7

8  
9 Edvard Ehler was involved in the provision of study materials or patients, collection and  
10 assembly of data, manuscript review and critique, and final approval of manuscript.  
11

12  
13 Benjamin Zakine was involved in the concept and design, data analysis and interpretation,  
14 manuscript writing, manuscript review and critique, and final approval of manuscript.  
15

16  
17 Pascal Maisonobe was involved in the concept and design, data analysis and interpretation,  
18 manuscript writing, manuscript review and critique, and final approval of manuscript.  
19

20  
21 Marion Simonetta-Moreau was involved in the concept and design, provision of study  
22 materials or patients, manuscript review and critique, and final approval of manuscript.  
23  
24  
25  
26  
27  
28  
29  
30  
31  
32  
33  
34  
35  
36  
37  
38  
39  
40  
41  
42  
43  
44  
45  
46  
47  
48  
49  
50  
51  
52  
53  
54  
55  
56  
57  
58  
59  
60

## References

1. Bhidayasiri R, Tarsy D. Treatment of dystonia. *Expert Rev Neurother* 2006;**6**:863-86.
2. Epidemiological Study of Dystonia in Europe (ESDE) Collaborative Group. A prevalence study of primary dystonia in eight European countries. *J Neurol* 2000;**247**:787-92.
3. Nutt JG, Muentner MD, Aronson A, et al. Epidemiology of focal and generalized dystonia in Rochester, Minnesota. *Mov Disord* 1988;**3**:188-94.
4. Velickovic M, Benabou R, Brin MF. Cervical dystonia pathophysiology and treatment options. *Drugs* 2001;**61**:1921-43.
5. Jankovic J, Leder S, Warner D, et al. Cervical dystonia: clinical findings and associated movement disorders. *Neurology* 1991;**41**:1088-91.
6. Brashear A. Botulinum toxin type A in the treatment of patients with cervical dystonia. *Biologics* 2009;**3**:1-7.
7. Albanese A, Asmus F, Bhatia KP, et al. EFNS guidelines on diagnosis and treatment of primary dystonias. *Eur J Neurol* 2010;**18**:5-18.
8. Simpson DM, Blitzer A, Brashear A, et al. Assessment: Botulinum neurotoxin for the treatment of movement disorders (an evidence-based review): report of the Therapeutics and Technology Assessment Subcommittee of the American Academy of Neurology. *Neurology* 2008;**70**:1699-706.
9. Truong D, Duane DD, Jankovic J, et al. Efficacy and safety of botulinum type A toxin (Dysport) in cervical dystonia: results of the first US randomized, double-blind, placebo-controlled study. *Mov Disord* 2005;**20**:783-91.
10. Consky ES, Lang AE. Clinical assessments of patients with cervical dystonia. In: Jankovic J, Hallett M, eds. *Therapy with botulinum toxin*. New York: M. Dekker 1994:211-37.
11. Tsui JK, Eisen A, Stoessl AJ, et al. Double-blind study of botulinum toxin in spasmodic torticollis. *Lancet* 1986;**2**:245-7.

- 1  
2  
3 12. Cano SJ, Hobart JC, Edwards M, et al. CDIP-58 can measure the impact of botulinum  
4 toxin treatment in cervical dystonia. *Neurology* 2006;**67**:2230-2.  
5  
6  
7 13. Ranoux D, Gury C, Fondarai J, et al. Respective potencies of Botox and Dysport: a  
8 double blind, randomised, crossover study in cervical dystonia. *J Neurol Neurosurg*  
9 *Psychiatry* 2002;**72**:459-62.  
10  
11  
12 14. Stacy M. Epidemiology, clinical presentation, and diagnosis of cervical dystonia. *Neurol*  
13 *Clin* 2008;**26 Suppl 1**:23-42.  
14  
15  
16 15. Slawek J, Friedman A, Potulska A, et al. Factors affecting the health-related quality of  
17 life of patients with cervical dystonia and the impact of botulinum toxin type A  
18 injections. *Functional Neurology* 2007;**22**:95-100.  
19  
20  
21 16. Skogseid IM, Malt UF, Roislien J, et al. Determinants and status of quality of life after  
22 long-term botulinum toxin therapy for cervical dystonia. *Eur J Neurol* 2007;**14**:1129-37.  
23  
24  
25 17. Costa J, Espirito-Santo C, Borges A, et al. Botulinum toxin type A therapy for cervical  
26 dystonia. *Cochrane Database Syst Rev* 2005:CD003633.  
27  
28  
29 18. Truong D, Brodsky M, Lew M, et al. Long-term efficacy and safety of botulinum toxin  
30 type A (Dysport) in cervical dystonia. *Parkinsonism Relat Disord* 2010;**16**:316-23.  
31  
32  
33  
34  
35  
36  
37  
38  
39  
40  
41  
42  
43  
44  
45  
46  
47  
48  
49  
50  
51  
52  
53  
54  
55  
56  
57  
58  
59  
60

Figures

Figure 1: Responder analysis

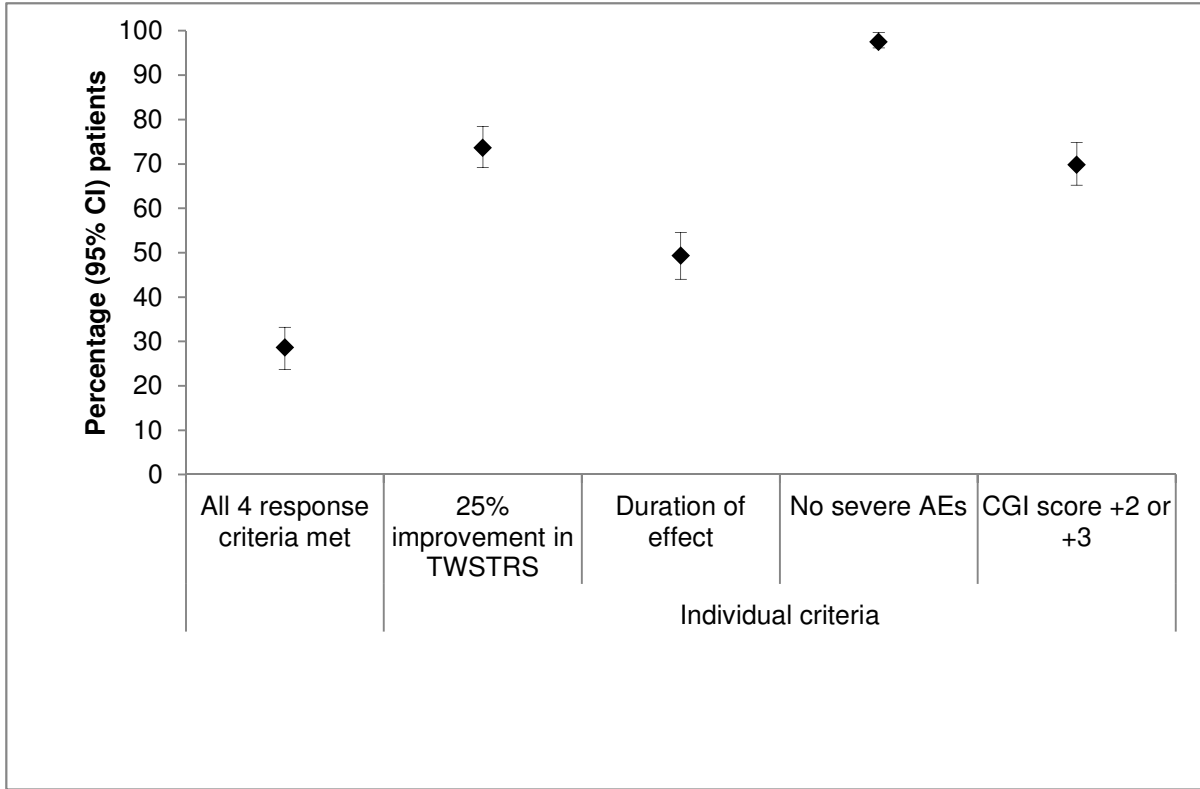

CI=confidence interval; TWSTRS=Toronto Western Spasmodic Torticollis Rating Scale; AEs=adverse events; CGI=clinical global improvement.

Figure 2: Subgroup analyses of responders (efficacy population)

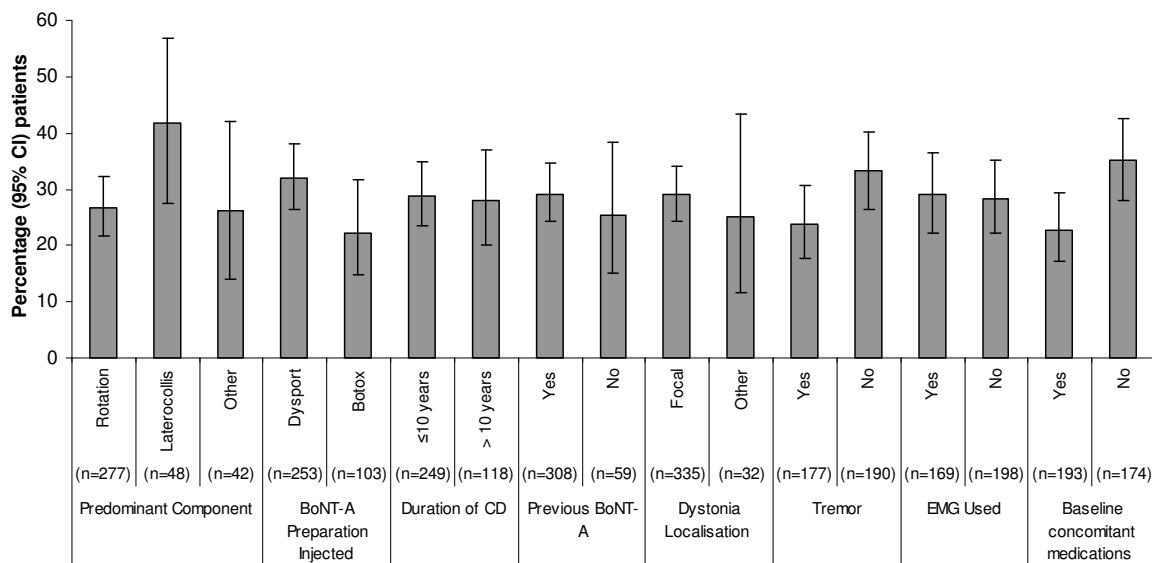

CI=confidence interval; CD=cervical dystonia; EMG = Electromyography; BoNT-A=Botulinum toxin A.

Figure 3: Occurrence of adverse events with frequently used BoNT-A preparation

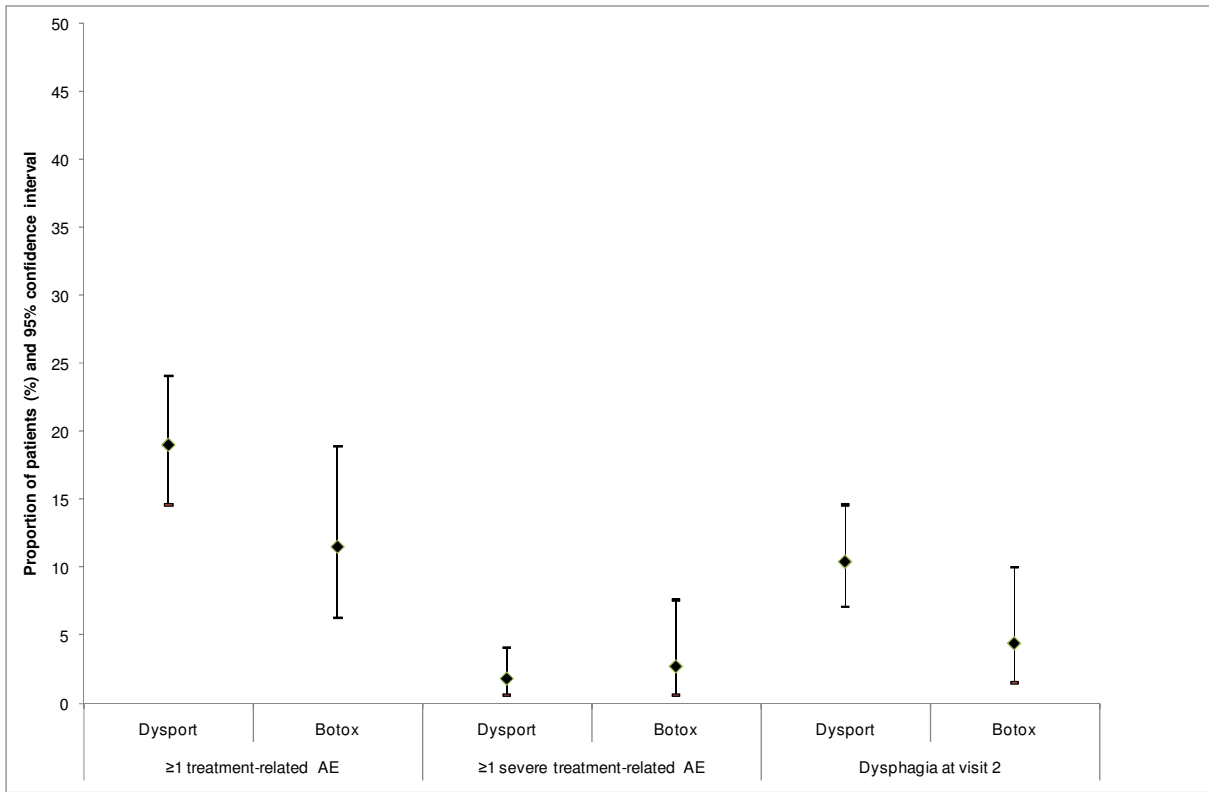

BoNT-A=Botulinum toxin A; AE=adverse event.



1  
2  
3  
4  
5  
6  
7  
8  
9  
10  
11  
12  
13  
14  
15  
16  
17  
18  
19  
20  
21  
22  
23  
24  
25  
26  
27  
28  
29  
30  
31  
32  
33  
34  
35  
36  
37  
38  
39  
40  
41  
42  
43  
44  
45  
46  
47  
48  
49  
50  
51  
52  
53  
54  
55  
56  
57  
58  
59  
60

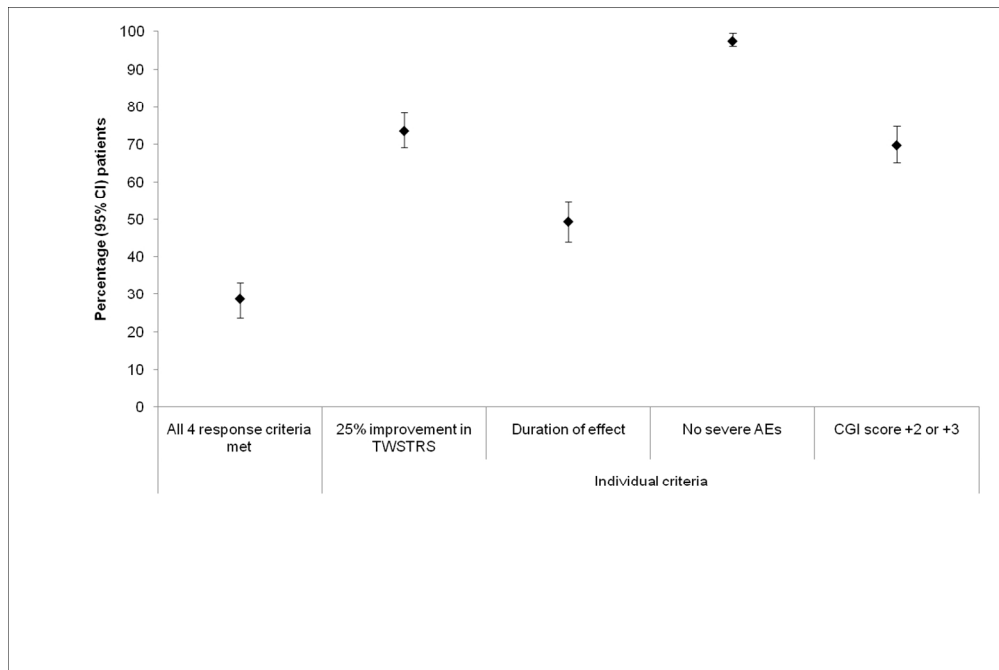

Responder analysis  
237x158mm (150 x 150 DPI)

Review only

1  
2  
3  
4  
5  
6  
7  
8  
9  
10  
11  
12  
13  
14  
15  
16  
17  
18  
19  
20  
21  
22  
23  
24  
25  
26  
27  
28  
29  
30  
31  
32  
33  
34  
35  
36  
37  
38  
39  
40  
41  
42  
43  
44  
45  
46  
47  
48  
49  
50  
51  
52  
53  
54  
55  
56  
57  
58  
59  
60

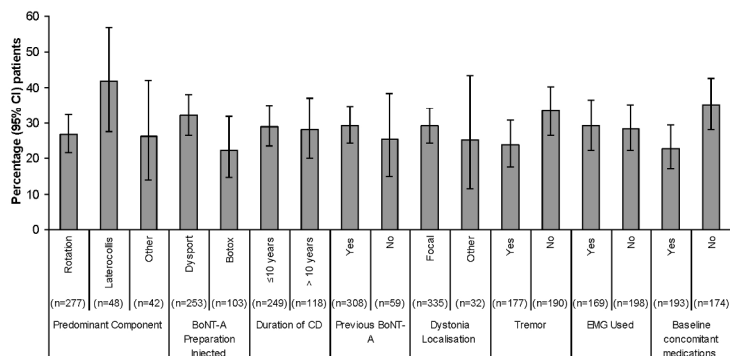

Subgroup analyses of responders (efficacy population)  
297x210mm (200 x 200 DPI)

view only

1  
2  
3  
4  
5  
6  
7  
8  
9  
10  
11  
12  
13  
14  
15  
16  
17  
18  
19  
20  
21  
22  
23  
24  
25  
26  
27  
28  
29  
30  
31  
32  
33  
34  
35  
36  
37  
38  
39  
40  
41  
42  
43  
44  
45  
46  
47  
48  
49  
50  
51  
52  
53  
54  
55  
56  
57  
58  
59  
60

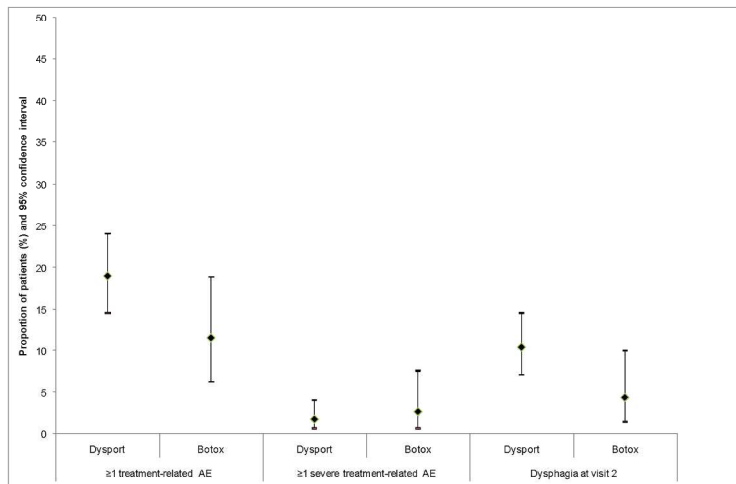

Occurrence of adverse events with frequently used BoNT-A preparation  
297x210mm (200 x 200 DPI)

view only

STROBE Statement—Checklist of items that should be included in reports of *cohort studies*

|                              | Item No | Recommendation                                                                                                                                                                                                                                                                                                                                                                                                                                                           |
|------------------------------|---------|--------------------------------------------------------------------------------------------------------------------------------------------------------------------------------------------------------------------------------------------------------------------------------------------------------------------------------------------------------------------------------------------------------------------------------------------------------------------------|
| <b>Title and abstract</b>    | 1       | (a) Indicate the study's design with a commonly used term in the title or the abstract<br><u>- yes</u><br>(b) Provide in the abstract an informative and balanced summary of what was done and what was found- <u>yes</u>                                                                                                                                                                                                                                                |
| <b>Introduction</b>          |         |                                                                                                                                                                                                                                                                                                                                                                                                                                                                          |
| Background/rationale         | 2       | Explain the scientific background and rationale for the investigation being reported- <u>yes</u>                                                                                                                                                                                                                                                                                                                                                                         |
| Objectives                   | 3       | State specific objectives, including any prespecified hypotheses - <u>yes</u>                                                                                                                                                                                                                                                                                                                                                                                            |
| <b>Methods</b>               |         |                                                                                                                                                                                                                                                                                                                                                                                                                                                                          |
| Study design                 | 4       | Present key elements of study design early in the paper- <u>yes</u>                                                                                                                                                                                                                                                                                                                                                                                                      |
| Setting                      | 5       | Describe the setting, locations, and relevant dates, including periods of recruitment, exposure, follow-up, and data collection- <u>yes</u>                                                                                                                                                                                                                                                                                                                              |
| Participants                 | 6       | (a) Give the eligibility criteria, and the sources and methods of selection of participants. Describe methods of follow-up- <u>yes</u><br>(b) For matched studies, give matching criteria and number of exposed and unexposed                                                                                                                                                                                                                                            |
| Variables                    | 7       | Clearly define all outcomes, exposures, predictors, potential confounders, and effect modifiers. Give diagnostic criteria, if applicable - <u>these data are not relevant</u>                                                                                                                                                                                                                                                                                            |
| Data sources/<br>measurement | 8*      | For each variable of interest, give sources of data and details of methods of assessment (measurement). Describe comparability of assessment methods if there is more than one group - <u>NA</u>                                                                                                                                                                                                                                                                         |
| Bias                         | 9       | Describe any efforts to address potential sources of bias - <u>yes</u>                                                                                                                                                                                                                                                                                                                                                                                                   |
| Study size                   | 10      | Explain how the study size was arrived at – was there a sample size calculation? <u>Yes</u>                                                                                                                                                                                                                                                                                                                                                                              |
| Quantitative variables       | 11      | Explain how quantitative variables were handled in the analyses. If applicable, describe which groupings were chosen and why                                                                                                                                                                                                                                                                                                                                             |
| Statistical methods          | 12      | (a) Describe all statistical methods, including those used to control for confounding- <u>No control for confounding factors</u><br>(b) Describe any methods used to examine subgroups and interactions<br>(c) Explain how missing data were addressed <u>Missing data handling was addressed in the SAP (no estimation was made)</u><br>(d) If applicable, explain how loss to follow-up was addressed - <u>NA</u><br>(e) Describe any sensitivity analyses - <u>NA</u> |
| <b>Results</b>               |         |                                                                                                                                                                                                                                                                                                                                                                                                                                                                          |
| Participants                 | 13*     | (a) Report numbers of individuals at each stage of study—eg numbers potentially eligible, examined for eligibility, confirmed eligible, included in the study, completing follow-up, and analysed - <u>yes</u><br>(b) Give reasons for non-participation at each stage - <u>NA</u><br>(c) Consider use of a flow diagram - <u>NA</u>                                                                                                                                     |
| Descriptive data             | 14*     | (a) Give characteristics of study participants (eg demographic, clinical, social) and information on exposures and potential confounders - <u>yes</u><br>(b) Indicate number of participants with missing data for each variable of interest - <u>yes</u><br>(c) Summarise follow-up time (eg, average and total amount) - <u>NA</u>                                                                                                                                     |
| Outcome data                 | 15*     | Report numbers of outcome events or summary measures over time - <u>YES</u>                                                                                                                                                                                                                                                                                                                                                                                              |

|                                           |                          |    |                                                                                                                                                                                                                                             |
|-------------------------------------------|--------------------------|----|---------------------------------------------------------------------------------------------------------------------------------------------------------------------------------------------------------------------------------------------|
| 1<br>2<br>3<br>4<br>5<br>6<br>7<br>8<br>9 | Main results             | 16 | (a) Give unadjusted estimates and, if applicable, confounder-adjusted estimates and their precision (eg, 95% confidence interval). Make clear which confounders were adjusted for and why they were included - <a href="#">Not relevant</a> |
| 10<br>11                                  | Other analyses           | 17 | Report other analyses done—eg analyses of subgroups and interactions, and sensitivity analyses- <a href="#">Not relevant</a>                                                                                                                |
| 12                                        | <b>Discussion</b>        |    |                                                                                                                                                                                                                                             |
| 13                                        | Key results              | 18 | Summarise key results with reference to study objectives - <a href="#">yes</a>                                                                                                                                                              |
| 14<br>15<br>16                            | Limitations              | 19 | Discuss limitations of the study, taking into account sources of potential bias or imprecision. Discuss both direction and magnitude of any potential bias - <a href="#">yes</a>                                                            |
| 17<br>18<br>19<br>20                      | Interpretation           | 20 | Give a cautious overall interpretation of results considering objectives, limitations, multiplicity of analyses, results from similar studies, and other relevant evidence - <a href="#">yes</a>                                            |
| 21                                        | Generalisability         | 21 | Discuss the generalisability (external validity) of the study results - <a href="#">yes</a>                                                                                                                                                 |
| 22                                        | <b>Other information</b> |    |                                                                                                                                                                                                                                             |
| 23<br>24<br>25<br>26                      | Funding                  | 22 | Give the source of funding and the role of the funders for the present study and, if applicable, for the original study on which the present article is based - <a href="#">yes</a>                                                         |

\*Give information separately for exposed and unexposed groups.

**Note:** An Explanation and Elaboration article discusses each checklist item and gives methodological background and published examples of transparent reporting. The STROBE checklist is best used in conjunction with this article (freely available on the Web sites of PLoS Medicine at <http://www.plosmedicine.org/>, Annals of Internal Medicine at <http://www.annals.org/>, and Epidemiology at <http://www.epidem.com/>). Information on the STROBE Initiative is available at <http://www.strobe-statement.org>.



**Factors influencing response to Botulinum toxin type A in patients with idiopathic cervical dystonia: Results from an international, observational study**

|                                 |                                                                                                                                                                                                                                                                                                                                                                                                                         |
|---------------------------------|-------------------------------------------------------------------------------------------------------------------------------------------------------------------------------------------------------------------------------------------------------------------------------------------------------------------------------------------------------------------------------------------------------------------------|
| Journal:                        | <i>BMJ Open</i>                                                                                                                                                                                                                                                                                                                                                                                                         |
| Manuscript ID:                  | bmjopen-2012-000881.R1                                                                                                                                                                                                                                                                                                                                                                                                  |
| Article Type:                   | Research                                                                                                                                                                                                                                                                                                                                                                                                                |
| Date Submitted by the Author:   | 10-Apr-2012                                                                                                                                                                                                                                                                                                                                                                                                             |
| Complete List of Authors:       | Misra, Vijay; The National Hospital for Neurology & Neurosurgery, Ehler, Edvard; County Hospital Pardubice, Department of Neurology Zakine, Benjamin; Ipsen Pharma, Global medical Affairs Maisonobe, Pascal; Ipsen Pharma, Biostatistics & Data Management Simonetta-Moreau, Marion; IPôle Neurosciences, Hôpitaux de Toulouse, Pavillon Riser & INSERM U825, Pavillon Baudot Purpan Hospital, Department of Neurology |
| <b>Primary Subject Heading</b>: | Neurology                                                                                                                                                                                                                                                                                                                                                                                                               |
| Secondary Subject Heading:      | Neurology                                                                                                                                                                                                                                                                                                                                                                                                               |
| Keywords:                       | Neuromuscular disease < NEUROLOGY, Adult neurology < NEUROLOGY, Neurological pain < NEUROLOGY                                                                                                                                                                                                                                                                                                                           |
|                                 |                                                                                                                                                                                                                                                                                                                                                                                                                         |

SCHOLARONE™  
Manuscripts

only

1  
2  
3 **Article type:** Full Paper  
4  
5

6 **PROPOSED TITLE:** Factors influencing response to Botulinum toxin type A in patients with  
7 idiopathic cervical dystonia: Results from an international, observational study  
8  
9

10  
11 **Authors:** Vijay P. Misra<sup>1</sup>, Edvard Ehler<sup>2</sup>, Benjamin Zakine<sup>3</sup>, Pascal Maisonobe<sup>4</sup> and Marion  
12 Simonetta-Moreau<sup>5</sup> on behalf of the INTEREST IN CD group  
13  
14

15  
16 **Affiliations:** <sup>1</sup>Department of Neurology, The National Hospital for Neurology & Neurosurgery,  
17 Queen Square, London WC1N 3BG, UK; <sup>2</sup>Department of Neurology, County Hospital  
18 Pardubice, Kyjevská 44, CZ 532 03 Pardubice, Czech Republic; <sup>3</sup>Global Medical  
19 Affairs, Ipsen Pharma, 65 Quai Georges Gorse, Boulogne-Billancourt 92100, France; <sup>4</sup>  
20 Biostatistics & Data Management, Ipsen Pharma, 65 Quai Georges Gorse, Boulogne-  
21 Billancourt 92100, France; <sup>5</sup>Department of Neurology, IPôle Neurosciences, Hôpitaux de  
22 Toulouse, Pavillon Riser & INSERM U825, Pavillon Baudot Purpan Hospital, place du Dr  
23 Baylac, Toulouse, F-31059 France  
24  
25  
26  
27  
28

29  
30  
31 **Corresponding author:** Vijay P. Misra  
32  
33

34 **Contact address:**

35 The National Hospital for Neurology & Neurosurgery  
36 Queen Square  
37 London, WC1N 3BG, UK  
38

39 **Tel:** +44 207 483 5017

40 **Fax:** +44 207 483 5217

41 **E-mail:** peter.misra@virgin.net  
42  
43

44  
45  
46  
47 **Email addresses for all authors:**

48 Vijay P. Misra: [peter.misra@virgin.net](mailto:peter.misra@virgin.net)

49 Edvard Ehler: [eda.ehler@tiscali.cz](mailto:eda.ehler@tiscali.cz)

50 Benjamin Zakine: [benjamin.zakine@ipson.com](mailto:benjamin.zakine@ipson.com)

51 Pascal Maisonobe: [pascal.maisonobe@ipson.com](mailto:pascal.maisonobe@ipson.com)

52 Marion Simonetta-Moreau: [simonetta.m@chu-toulouse.fr](mailto:simonetta.m@chu-toulouse.fr)  
53  
54  
55  
56  
57

58  
59 **Key words:** idiopathic cervical dystonia, botulinum toxin  
60

**Previous publications:**

1. Poster presentation, “An International, Observational Study To Define Factors Influencing Response to Botulinum Toxin Type A (BoNT-A) in Subjects with Idiopathic Cervical Dystonia: Methodology and Baseline Clinical Data” at the 63rd Annual Meeting of the American Academy of Neurology, Honolulu, Hawaii, 9–16 April 2011. Abstract number P04.224.
2. Poster presentation, “An international, observational study to define in real life practice response to Botulinum toxin type A (BoNT-A) injection in subjects with idiopathic cervical dystonia” at The MDS 15th International Congress of Parkinson's Disease and Movement Disorders, Toronto, ON, Canada, 5–9 June 2011. Abstract number 662.
3. Poster presentation, “An international, observational study to identify in real life practice prognostic factors for response to Botulinum toxin type A injection in subjects with cervical dystonia” at the 15<sup>th</sup> Congress of the European Federation of Neurological Societies, Budapest, Hungary, 10–13 September 2011. Abstract number P1497.
4. Poster presentation, “An international, observational study to define in real life practice response to Botulinum toxin type A (BoNT-A) injection in subjects with idiopathic cervical dystonia” at the 7<sup>th</sup> International Conference on Basic and Therapeutic Aspects of Botulinum and Tetanus Toxins – Toxins 2011, Santa Fe, USA, 2–5 October 2011.

**Word count (abstract)/limit:** 276/300 words

**Word count (text)/limit:** 3278/4000 words exclusive of title page, abstract, figures/tables, and references

**Figures/tables/limit:** 5/5 figures and/or tables

**References/limit:**20/40

**Copyright statement**

“The Corresponding Author has the right to grant on behalf of all authors and does grant on behalf of all authors, an exclusive licence (or non-exclusive for UK Crown Employees) on a worldwide basis to the BMJ Publishing Group Ltd, and its Licensees to permit this article (if accepted) to be published in *BMJ Open* and any other BMJ PGL products and to exploit all subsidiary rights, as set out in our licence.”



**ABSTRACT:**

*Objectives:* Real-life data on response to Botulinum toxin A (BoNT-A) in cervical dystonia (CD) are sparse. An expert group of neurologists was convened with the overall aim to develop a definition of treatment response, which could be applied in a non-interventional study of BoNT-A-treated subjects with CD.

*Design:* International, multicentre, prospective, observational study of a single injection cycle of BoNT-A as part of normal clinical practice.

*Setting:* 38 centres across Australia, Belgium, Czech Republic, France, Germany, The Netherlands, Portugal, Russia and the United Kingdom.

*Participants:* 404 adult subjects with idiopathic CD. Most subjects were female, aged 41–60 years, and had previously received BoNT-A.

*Outcome measures:* Patients were classified as responders if they met all of the following four criteria: magnitude of effect ( $\geq 25\%$  improvement Toronto Western Spasmodic Torticollis Rating Scale), duration of effect ( $\geq 12$ -week interval between the BoNT-A injection day and subject-reported waning of treatment effect), tolerability (absence of severe related adverse event), and subject's positive clinical global improvement (CGI).

*Results:* High rates of response were observed for magnitude of effect (73.6%), tolerability (97.5%), and subject's CGI (69.8%). The subjective duration of effect criterion was achieved by 49.3% of subjects; 28.6% of subjects achieved the responder definition. Factors most strongly associated to response were age ( $< 40$  years; odds ratio 3.9,  $p < 0.05$ ) and absence of baseline head tremor (odds ratio 1.5; not significant).

*Conclusions:* Three of four criteria were met by most patients. The proposed multidimensional definition of response appears to be practical for routine practice. Unrealistically high patient expectation and subjectivity may influence the perception of a quick waning of effect, but highlights that this aspect may be a hurdle to response in some patients.

**Clinical trials information:** (NCT00833196; clinicaltrials.gov)

**ARTICLE SUMMARY****Article focus:**

- Development and application of a novel multimodal definition of treatment response in a non-interventional study of patients with cervical dystonia (CD) administered Botulinum toxin A (BoNT-A) in routine clinical practice.

**Key messages:** For peer review only - <http://bmjopen.bmj.com/site/about/guidelines.xhtml>

- Magnitude of effect, subject satisfaction and safety profile are appropriate measures of BoNT-A response in patients with CD.
- A multidimensional definition of response enables comprehensive evaluation of treatment response that is not achievable with a single measurement criterion.

**Strengths and limitations of this study:**

- This is a large-scale study of CD patient demographics and BoNT-A response in a real-life clinical setting.
- The subjective nature of self-reported waning of treatment effect is potentially vulnerable to bias as a result of high patient expectation, which constrains its use as part of the challenging multidimensional definition of response.

## INTRODUCTION

Cervical dystonia (CD) is the most common of the focal dystonias,<sup>1</sup> with a prevalence of 89 per million in parts of the US (Rochester, Minnesota).<sup>2</sup> Any muscle in the neck may be abnormally contracted in CD. Sets of contracted muscles can be found in isolation, but are most commonly found in combination.<sup>3</sup> The majority of cases (~66%) present with rotational torticollis and laterocollis.<sup>4</sup> Classification of CD is based on the primary (idiopathic) or secondary aetiology (e.g., dystonia because of a brain tumour).<sup>5</sup>

Botulinum toxin A (BoNT-A) is a neurotoxin that is isolated and purified from *Clostridium botulinum* type A bacteria and has gained increasing acceptance as a first-line treatment option for CD.<sup>6</sup> There is a substantial body of evidence from clinical studies to support the use of BoNT-A in patients with CD.<sup>5,7-9</sup> There are currently three major commercially available preparations of Type A toxins: abobotulinumtoxinA (Dysport<sup>®</sup>, Ipsen), onabotulinumtoxinA (Botox<sup>®</sup>, Allergan Incorporated) and incobotulinumtoxinA (Xeomin<sup>®</sup>, Merz Pharmaceuticals GmbH), which differ in their potency; thus, the units of each preparation are not directly interchangeable. BoNT-B has also gained acceptance in the treatment of patients with CD resistant to treatment with BoNT-A.<sup>10</sup>

The administration of BoNT-A in practice does not reflect the standardised methods adopted in clinical studies because injection schemes are individually determined by the physician. Moreover, BoNT-A administration protocols for CD are not standardised to the subtypes of the condition (i.e. predominant and secondary components for head and neck deviations). Although the efficacy and safety of BoNT-A is widely accepted according to robust and well-designed clinical trials; these studies assessed efficacy using mainly Toronto Western Spasmodic Torticollis Rating Scale (TWSTRS) or Tsui scale in highly selected patients, which may not relate to real-life practice with individualised patients.

In clinical practice, assessment of BoNT-A effectiveness is multidimensional and cannot be limited to TWSTRS or Tsui scale only, but data on efficacy and safety of BoNT-A in real-world settings are lacking. There is, therefore, a clinical need to pragmatically describe the management of CD subtypes innovatively, taking into account several dimensions of interest for physicians, such as patient's satisfaction, and to establish a robust definition of response to BoNT-A treatment in the real-life management of patients with CD. A meeting of experienced neurologists from France, Germany, Italy, Russia, Spain, Thailand and the United Kingdom was convened in 2008, with a view to reaching a consensus on a definition of treatment response, a definition currently lacking in the clinical management of patients with CD receiving BoNT-A. The expert group identified the most relevant predominant and secondary components for head and neck deviations and concurred in proposing a new multidimensional definition of response, which was based on combined aspects of efficacy and tolerability and assessment of global improvement. We present,

1  
2  
3 herein, findings from the application of this novel definition of treatment response in a non-  
4 interventional study of subjects with CD who were administered BoNT-A. In this study, the  
5 primary objective was to estimate the responder rate following one BoNT-A injection cycle  
6 administered via routine practice. Prognostic factors for response were evaluated as an  
7 additional exploratory analysis.  
8  
9  
10  
11  
12  
13  
14  
15  
16  
17  
18  
19  
20  
21  
22  
23  
24  
25  
26  
27  
28  
29  
30  
31  
32  
33  
34  
35  
36  
37  
38  
39  
40  
41  
42  
43  
44  
45  
46  
47  
48  
49  
50  
51  
52  
53  
54  
55  
56  
57  
58  
59  
60

## SUBJECTS AND METHODS

### Study design

This was an international, multicentre, observational, prospective, longitudinal study. Informed consent was obtained prior to subject enrolment and prior to any data collection. Independent Ethics Committee (IEC)/Institutional Review Board (IRB) approval in each country was obtained prior to study initiation.

### Study population

This study enrolled subjects  $\geq 18$  years old, suffering from idiopathic CD with a TWSTRS severity score  $\geq 15$ ,<sup>9</sup> and a  $\geq 12$ -week interval between the last injection (BoNT-A or BoNT-B) and the first study visit.

To create a homogeneous population for study, subjects with secondary CD were excluded from the study, as were subjects with contraindications of BoNT-A treatment.

### Study treatment

The decision to prescribe a BoNT-A preparation was taken prior to, and independently from, the decision to enrol the subject in the study. In order to avoid bias in the recruitment of subjects, physicians were not allowed to choose their subjects, but were asked to include consecutive subjects during BoNT-A consultations.

The prescribing of BoNT-A was made in accordance with routine clinical practice and investigators were free to choose: the targeted muscles from the clinically indicated neck muscles; BoNT-A preparation; and injected dose number of points and volume per point. Subjects received a single injection cycle as part of normal clinical practice. Concomitant therapy was permitted throughout the study.

### Study assessments

Subjects were assessed during their usual centre visits at the inclusion visit (Visit 1; week 0); follow-up visit (Visit 2; 3–6 weeks after injection); and end-of-study visit (Visit 3; 12–16 weeks after injection). Efficacy assessments encompassed clinical assessment; assessment of CD using the TWSTRS total score (recorded at all visits);<sup>11</sup> assessment of tremor using the Tsui Tremor subscale (recorded at all visits);<sup>12</sup> assessment of Clinical Global Improvement (CGI) by both Investigator and subject (recorded at Visit 2); and CD Impact Profile-58 (CDIP-58) (recorded at Visits 1 and 2).<sup>13</sup> The CDIP-58 comprises a 16-item health-related quality of life (HRQoL) questionnaire encompassing domains relating to head and neck symptoms experienced by the subject, impact on usual daily activities, physical activities, sleep, social activities, and emotions/psychosocial functioning. Scores for items within domains were

1  
2  
3 summarised into eight subscale scores, each ranging from 0 to 100 (higher scores indicate  
4 worse health).

5  
6 The primary endpoint of this study was the percentage of responders after one BoNT-  
7 A injection cycle. Response was defined using the ambitious hypothesis for a  
8 multidimensional definition of response developed by experienced neurologists, whereby  
9 subjects were classified as a responder if they met all of the following criteria: 1) Magnitude  
10 of effect:  $\geq 25\%$  improvement on TWSTRS severity scale at Visit 2 (peak effect) or Visit 3 (if  
11 Visit 2 was not performed), compared with Visit 1, as reported by Truong et al. in 2005;<sup>9</sup> 2)  
12 Duration of effect:  $\geq 12$ -week interval between the BoNT-A study injection day and the day  
13 the subject reports a clinically relevant waning of treatment effect, justifying a re-injection  
14 cycle as reported by Ranoux et al. in 2002;<sup>14</sup> 3) Good tolerance: no treatment-related severe  
15 adverse event (AE) reported during the study; and 4) **Improvement in** subject-rated CGI  
16 score at Visit 2 and Visit 3 (equal to either +2 [much improved] or +3 [very much improved]).  
17  
18  
19  
20  
21  
22  
23

24 Secondary efficacy outcomes included improvements in TWSTRS total and Severity,  
25 Disability and Pain subscale scores, tremor (as measured by TSUI score) and CDIP-58.

26  
27 Only AEs considered by the Investigator to be related to study drug were collected  
28 during this study, which is in line with current clinical practice. Investigators were asked to  
29 report, to the safety department of the BoNT-A manufacturer, any adverse drug reactions  
30 using the usual process for such reactions. More specifically on Visits 2 and 3, investigators  
31 were also requested to document the occurrence and intensity (severe or not) of dysphonia,  
32 dysphagia, neck muscle weakness and other.  
33  
34  
35  
36  
37  
38

### 39 **Study size**

40 The sample size was determined based on both the primary and exploratory objectives  
41 (**prognostic factors for response**). Considering an anticipated rate of responder of 50%, using  
42 an estimate for this proportion with a precision of 5%, the required sample size was  
43 determined to be 385 subjects (assuming a two-sided 95% confidence interval [CI]). When  
44 considering the objective related to the detection of prognostic factors (assuming Alpha=5%,  
45 Power=80%), in order to ensure the ability to detect odds ratio  $\geq 2$  and a probability to be  
46 exposed to any given level of a prognostic factor larger or equal to 1/3 (=imbalance), the  
47 required sample size is 366 subjects. Thus in order to ensure 385 evaluable subjects, 400  
48 subjects were included in this study.  
49  
50  
51  
52  
53  
54  
55  
56

### 57 **Statistical analyses**

58 The safety population consisted of all subjects who received one BoNT-A injection, whereas  
59 the efficacy population comprised all subjects in the treated population for whom there were  
60 data for each of the four underlying variables for response. The responder analysis was

1  
2  
3 performed using the efficacy population and all secondary endpoints were assessed using  
4 the safety population.  
5

6 The primary endpoint was summarised overall, and by each of the four criteria, as the  
7 percentage of responders as a point estimate and its associated 95% CI. Responder  
8 subgroup analyses were also performed to investigate response based on the following  
9 criteria: predominant component of head/neck rotation; BoNT-A preparations; duration of CD;  
10 previous BoNT-A use; dystonia localisation (head/neck, trunk, limbs); presence of tremor  
11 based on the TSUI scale; use of electromyography (EMG); and use of concomitant therapies  
12 at baseline.  
13  
14  
15  
16  
17

18 As an exploratory analysis, a stepwise multivariate logistic regression analysis was  
19 performed on the efficacy population to assess prognostic factors for response using  
20 subgroup variables, as well as additional demographic and disease characteristics variables.  
21 Odds ratios (OR) with 95% CI estimated by the logistic model were calculated using the  
22 primary criteria; a lower 95% CI bound >1 indicated a significantly increased chance of being  
23 a responder.  
24  
25  
26

27 No estimations were made for missing data and there was no controlling for  
28 confounding factors.  
29  
30  
31  
32  
33  
34  
35  
36  
37  
38  
39  
40  
41  
42  
43  
44  
45  
46  
47  
48  
49  
50  
51  
52  
53  
54  
55  
56  
57  
58  
59  
60

## RESULTS

### Subject population

Between 19 February 2009 and 12 February 2010, 404 subjects from 38 centres in 9 countries (Australia, Belgium, Czech Republic, France, Germany, The Netherlands, Portugal, Russia and the United Kingdom) were enrolled and followed in this study. A total of 379 subjects (93.8%) completed the study. The most common reason for not completing the study was loss to follow-up (3.2%; n=13); no subjects discontinued due to lack of efficacy.

The safety population included all subjects treated with BoNT-A (n=404), whereas the efficacy population included all subjects treated with BoNT-A for whom data were available for each of the four criteria for the primary endpoint (n=367).

Baseline demographic and disease characteristics are shown in Table 1. The majority of subjects were female (64.9%), aged 41–60 years (52.5%), and had suffered from CD for >1 year (90.9%). Nearly all of the subjects had sporadic CD (94.8%), and focaldystonia predominated (91.6%). In the few cases of segmental/multifocal dystonias, the upper limb was the most frequently impaired segment. The most common predominant component of CD was rotation (72.8%), followed by laterocollis (14.1%). The majority of subjects had secondary components (83.9%).

**Table 1: Subject demographics and CD characteristics (safety population)**

| Demographic/characteristic           | Total, n=404        |            |
|--------------------------------------|---------------------|------------|
| Gender, n (%)                        | Male                | 142 (35.1) |
|                                      | Female              | 262 (64.9) |
| Age (years), n (%)                   | 18 to 30            | 18 (4.5)   |
|                                      | 31 to 40            | 52 (12.9)  |
|                                      | 41 to 50            | 105 (26.0) |
|                                      | 51 to 60            | 107 (26.5) |
|                                      | 61 to 70            | 81 (20.0)  |
|                                      | >70                 | 41 (10.1)  |
| Body weight (kg), mean (SD)          | 72.8 (14.9)         |            |
| Duration of cervical dystonia, n (%) | <6 months           | 10 (2.5)   |
|                                      | 6 months to <1 year | 27 (6.7)   |
|                                      | 1 to 5 years        | 140 (34.7) |
|                                      | 6 to 10 years       | 89 (22.0)  |
|                                      | 11 to 20 years      | 84 (20.8)  |
|                                      | >20 years           | 54 (13.4)  |
| Type of cervical dystonia, n (%)     | Sporadic            | 383 (94.8) |
|                                      | Familial            | 21 (5.2)   |
| Location type, n (%)                 | Focal               | 370 (91.6) |
|                                      | Segmental           | 20 (5.0)   |
|                                      | Multi-focal         | 9 (2.2)    |



|                                                                           |                                 |                 |
|---------------------------------------------------------------------------|---------------------------------|-----------------|
|                                                                           | Generalised                     | 5 (1.2)         |
| Localisation, n (%)                                                       | Head/neck                       | 404 (100.0)     |
|                                                                           | Trunk                           | 13 (3.2)        |
|                                                                           | Upper limb                      | 29 (7.2)        |
|                                                                           | Lower limb                      | 6 (1.5)         |
| Predominant component, n (%)                                              | Rotation                        | 294 (72.8)      |
|                                                                           | Laterocollis                    | 57 (14.1)       |
|                                                                           | Tremor                          | 20 (5.0)        |
|                                                                           | Retrocollis                     | 12 (3.0)        |
|                                                                           | Shoulder elevation              | 8 (2.0)         |
|                                                                           | Anterocollis                    | 4 (1.0)         |
|                                                                           | Jerk                            | 4 (1.0)         |
|                                                                           | Lateral shift of column         | 3 (0.7)         |
|                                                                           | Sagittal shift of column        | 2 (0.5)         |
| Secondary components present, n (%)                                       | Yes                             | 339 (83.9)      |
| Most frequent combinations of predominant and secondary components, n (%) | Rotation and laterocollis       | 161 (39.9)      |
|                                                                           | Rotation and shoulder elevation | 143 (35.4)      |
|                                                                           | Rotation and tremor             | 73 (18.1)       |
| TWSTRS score at baseline, mean $\pm$ SD                                   | Severity subscale               | 19.5 $\pm$ 3.8  |
|                                                                           | Disability subscale             | 10.6 $\pm$ 5.9  |
|                                                                           | Pain subscale                   | 6.6 $\pm$ 4.9   |
|                                                                           | Total score                     | 36.8 $\pm$ 10.7 |
| Baseline tremor present                                                   | n(%)                            | 191 (47.3)      |
| CDIP-58 subscales scores <sup>a</sup> , mean $\pm$ SD                     | Head and neck symptoms          | 50.6 $\pm$ 25.2 |
|                                                                           | Pain and discomfort             | 31.8 $\pm$ 27.8 |
|                                                                           | Upper limb activities           | 26.1 $\pm$ 24.6 |
|                                                                           | Walking                         | 22.4 $\pm$ 26.7 |
|                                                                           | Sleep                           | 23.0 $\pm$ 31.0 |
|                                                                           | Annoyance                       | 26.4 $\pm$ 27.7 |
|                                                                           | Mood                            | 21.6 $\pm$ 25.9 |
| Psychosocial                                                              | 30.7 $\pm$ 28.2                 |                 |

<sup>a</sup>CDIP-58 n=99 (questionnaire in English, thus completed by English speaking patients only).

## Treatment history

Most subjects had previously received a BoNT-A injection (84.9%). A minority of patients had prior history of treatment with BoNT-B (5.7%). Of the safety population, more than half of subjects (n=215; 53.2%) had previously received benzodiazepines for the treatment of CD and approximately one-third (29.7%) continued to receive these agents after BoNT-A treatment. Prior physical therapy was reported in 49.8% of subjects, but only 14.6% of subjects were receiving physical therapy at the inclusion visit. Analgesics had been previously taken by 40.8% of subjects, with 18.3% of subjects receiving analgesics at the inclusion visit.

## Injection schemes

Physicians prescribed three BoNT-A preparations: Dysport (n=279, 69%), Botox (n=113, 28%) and Xeomin (n=12, 3%), independently from study enrolment, as per local clinical practice at the center. Subjects received Dysport and Botox at median doses of 500 and 160 units, respectively. Overall, 90% of patients received less than 1000 U of Dysport and 300 U of Botox. In total, the median number of injected muscles was four; of which, the most frequently injected muscles in both the Dysport and Botox groups were the splenius capitis, sternocleidomastoid and trapezius. For Xeomin the median dose was 200 units although small patient numbers make results difficult to interpret. Investigators used EMG during administration of at least one muscle in 185 subjects (46.0%).

## Efficacy

### *Responder analysis*

The percentage of subjects meeting the response criteria, as well as each of the individual response criteria, is shown in Figure 1. Three criteria out of four were achieved in the majority of patients, as shown by 97.5%, 73.6% and 69.8% of subjects achieving criterion of magnitude of effect, tolerance (absence of severe related AEs) and subject's CGI, respectively. A total of 49.3% of subjects achieved response based on the duration of effect criterion ( $\geq 12$  weeks between inclusion and subject-rated waning of treatment effect).

Overall, 28.6% (95% CI: 24.0% to 33.5%) of subjects were classified as responders to treatment. Evaluation of response by TWSTRS, tolerance and CGI improvement alone (i.e. exclusion of duration of effect) established 58.3% (95% CI: 53.1% to 63.4%) of subjects as responders.

### *Responder subgroup analysis*

Analysis of the response criteria by subgroup is shown in Figure 2 and showed that there were variations in response, albeit these results were not statistically significant. Data

revealed that more subjects responded among subgroups presenting with laterocollis (41.7% versus 26.7% with rotation), without baseline tremor (33.2% versus 23.7% with tremor), and those not receiving concomitant medication at baseline (35.1% versus 22.8% receiving baseline concomitant medications).

### Prognostic factors associated with response

The multivariate logistic regression showed that the most strongly associated factor to response was age (<40 years; OR 3.9,  $p < 0.05$ ). Additional trends with a lower magnitude of association were observed (data not shown).

### Secondary efficacy outcomes

Secondary efficacy outcomes are shown in Table 2. Subjects reported a notable improvement in TWSTRS total score and subscale scores over the course of treatment, as indicated by the percentage change in scores at each visit. Sixty-six of the 181 subjects (36.5%) with baseline tremor no longer presented with tremor at Visit 2. HRQoL improved following BoNT-A treatment, as demonstrated by decreases in all eight subscores of the CDIP-58 at Visit 2.

**Table 2. Efficacy outcomes**

|                                                                        | Visit 2                    | Visit 3                    |
|------------------------------------------------------------------------|----------------------------|----------------------------|
| Percentage change in TWSTRS Score, mean $\pm$ SD                       | (n=374)                    | (n=380)                    |
| Severity subscore                                                      | -40.8 $\pm$ 25.1           | -16.5 $\pm$ 22.3           |
| Disability subscore                                                    | -36.3 $\pm$ 49.8           | -6.6 $\pm$ 90.2            |
| Pain subscore                                                          | -35.8 $\pm$ 49.9           | -7.6 $\pm$ 72.6            |
| Total score                                                            | -39.6 $\pm$ 26.6           | -15.4 $\pm$ 27.0           |
| Tremor                                                                 | (n=375)                    | (n=380)                    |
| Subjects with improvement in tremor <sup>a</sup> with treatment, n (%) | 66/181 <sup>b</sup> (36.5) | 41/178 <sup>a</sup> (23.0) |
| CDIP-58 subscales scores, mean $\pm$ SD                                | (n=93 <sup>c</sup> )       | –                          |
| Head and neck symptoms                                                 | 26.1 $\pm$ 21.9            | –                          |
| Pain and discomfort                                                    | 20.5 $\pm$ 23.5            | –                          |
| Upper limb activities                                                  | 16.3 $\pm$ 19.9            | –                          |
| Walking                                                                | 15.3 $\pm$ 21.5            | –                          |
| Sleep                                                                  | 12.3 $\pm$ 20.0            | –                          |
| Annoyance                                                              | 15.6 $\pm$ 23.9            | –                          |
| Mood                                                                   | 18.9 $\pm$ 20.5            | –                          |

|                          |             |   |
|--------------------------|-------------|---|
| Psychosocial functioning | 19.2 ± 23.6 | – |
|--------------------------|-------------|---|

<sup>a</sup>Improvement defined by presence of tremor at baseline and absence of tremor at subsequent visits.

<sup>b</sup>Subjects with data available at this timepoint and with tremor present at baseline.

<sup>c</sup>Questionnaire in English, thus completed by English speaking patients only.

### Safety and tolerability

A total of 88 treatment-related AEs were reported during the study. Overall, 68 subjects (16.8%) experienced at least one treatment-related AE. Of the observed AEs, dysphagia was the most commonly reported (9.2%). Overall, ten treatment-related AEs were considered to be severe, with neck muscle weakness (n=4) being observed as the most common AE at this grade of severity. The incidence of AEs (severe and not severe) and dysphagia did not statistically differ between BoNT-A preparations (Figure 3).

## DISCUSSION

In this non-interventional study of subjects with CD in routine practice, the majority of subjects were middle-aged women. These demographic data were in accordance with a typical population of subjects with CD.<sup>15</sup> TWSTRS and CDIP-58 scores at baseline reflected a population with moderate to severe CD severity.

Real-life data on response to BoNT-A in CD are relatively sparse,<sup>16–18</sup> and studies evaluating multidimensional definitions of response, in particular, are lacking. Therefore, the primary objective of this study was to estimate the rate of response following one BoNT-A injection cycle in real-life practice using a challenging multidimensional definition developed by an expert group of neurologists. To our knowledge, this is the first such non-interventional study to apply a consensus-based multimodal definition of response to a large real-world population of patients with CD treated with BoNT-A. In the interpretation of our findings, it should be borne in mind that clinical studies have commonly utilised a single or co-primary endpoint for example.<sup>19,20</sup> Thus, the requirement to achieve four primary endpoints within the multidimensional response definition proposed in this study represented a significant challenge. Notably, this ambitious definition for response was achieved by almost one-third (approximately 30%) of the 404 subjects who participated in this study. Although the magnitude of effect and subject satisfaction were both high and the number of treatment-related severe AEs was very low, the number of subjects with a duration of effect  $\geq 12$  weeks was relatively low. This is in contrast to published observations that suggest patients experience a duration of effect (mean or total) beyond 12 weeks, as shown in controlled trials of Dysport and Botox.<sup>6,9</sup> Considering three primary endpoints, that is with the exclusion of the duration of effect criterion, approximately 60% of patients achieved response. In the clinical experience of the expert group of neurologists, the level of response achieved with three or four co-primary endpoints is highly encouraging. Therefore, our novel findings indicate that measurements for the magnitude of effect, subject satisfaction and safety profile according to routine practice demonstrate good clinical response to BoNT-A in subjects suffering from CD. However, duration of effect such as defined in the study may require further confirmation due to its subjective nature. Waning of effect is a gradual process and therefore assessment for duration of effect based on serial subject's CGI measurements (rather than depending on the patient reporting on waning of effect on a single specific date) may have been more appropriate. Regardless of these considerations, unrealistically high patient expectation and subjectivity may influence the perception of quick waning of effect. This highlights that, for some patients, this aspect is seen as a hurdle to response.

The subgroup analyses suggest that laterocollis as a predominant component, the absence of baseline tremor and absence of concomitant medication are factors that may be associated with higher response rates. Even if these data were not statistically significant,

1  
2  
3 they provide a good starting point for further evaluation. In particular, it would be interesting  
4 to establish whether the use of concomitant medication at baseline reflects a greater disease  
5 severity (as assessed with TWSTRS scores) or more co-morbidities associated with CD (e.g.  
6 anxiety, depression) that could interfere with the therapeutic effect of BoNT-A. With  
7  
8 relevance to the former, data from this study suggest that the duration of CD ( $\leq 10$  years  
9 versus  $> 10$  years) did not markedly influence the distribution of concomitant therapies (data  
10 not shown).

11  
12  
13  
14 Efficacy findings confirm the value of BoNT-A as a treatment for CD symptoms.  
15 Notable improvements in mean TWSTRS scores were observed, as was improvement in  
16 tremor. It is recognised that HRQoL is compromised in CD, especially among women.<sup>20</sup> In  
17 this analysis of a largely female population, the decrease in subscores of the CDIP-58 (a  
18 more sensitive measure of clinical change than other frequently used HRQoL instruments<sup>13</sup> is  
19 consistent with previous reports in confirming the positive impact of BoNT-A on HRQoL when  
20 administered as a therapy for CD.<sup>21,22</sup>

21  
22  
23  
24  
25  
26 BoNT-A was generally well tolerated in this study, with few reported severe AEs. In  
27 general, treatment-emergent side effects were consistent with the known safety profile of this  
28 treatment.<sup>6</sup> As observed in previous reports, the most common side effect of BoNT-A  
29 treatment was dysphagia.<sup>6,20</sup> Overall, this study highlights that no new safety concerns were  
30 raised with BoNT-A when used in routine clinical practice. For any given treatment, an  
31 acceptable level of tolerance is required to ensure continued treatment and subject  
32 compliance; hence the inclusion of tolerance as a response criterion. In total, 97.5% of  
33 subjects met the response criterion of no severe treatment-related AEs. It may be speculated  
34 that the presence of treatment-emergent side effects such as dysphagia could exert a  
35 negative impact on objective and subjective assessments of symptom improvement and  
36 ultimately response, but observed response rates of 73.6% (magnitude of effect) and 69.8%  
37 (subject's CGI) in this study would suggest otherwise.

38  
39  
40  
41  
42  
43  
44  
45  
46  
47  
48  
49  
50  
51  
52  
53  
54  
55  
56  
57  
58  
59  
60  
61  
62  
63  
64  
65  
66  
67  
68  
69  
70  
71  
72  
73  
74  
75  
76  
77  
78  
79  
80  
81  
82  
83  
84  
85  
86  
87  
88  
89  
90  
91  
92  
93  
94  
95  
96  
97  
98  
99  
100  
101  
102  
103  
104  
105  
106  
107  
108  
109  
110  
111  
112  
113  
114  
115  
116  
117  
118  
119  
120  
121  
122  
123  
124  
125  
126  
127  
128  
129  
130  
131  
132  
133  
134  
135  
136  
137  
138  
139  
140  
141  
142  
143  
144  
145  
146  
147  
148  
149  
150  
151  
152  
153  
154  
155  
156  
157  
158  
159  
160  
161  
162  
163  
164  
165  
166  
167  
168  
169  
170  
171  
172  
173  
174  
175  
176  
177  
178  
179  
180  
181  
182  
183  
184  
185  
186  
187  
188  
189  
190  
191  
192  
193  
194  
195  
196  
197  
198  
199  
200  
201  
202  
203  
204  
205  
206  
207  
208  
209  
210  
211  
212  
213  
214  
215  
216  
217  
218  
219  
220  
221  
222  
223  
224  
225  
226  
227  
228  
229  
230  
231  
232  
233  
234  
235  
236  
237  
238  
239  
240  
241  
242  
243  
244  
245  
246  
247  
248  
249  
250  
251  
252  
253  
254  
255  
256  
257  
258  
259  
260  
261  
262  
263  
264  
265  
266  
267  
268  
269  
270  
271  
272  
273  
274  
275  
276  
277  
278  
279  
280  
281  
282  
283  
284  
285  
286  
287  
288  
289  
290  
291  
292  
293  
294  
295  
296  
297  
298  
299  
300  
301  
302  
303  
304  
305  
306  
307  
308  
309  
310  
311  
312  
313  
314  
315  
316  
317  
318  
319  
320  
321  
322  
323  
324  
325  
326  
327  
328  
329  
330  
331  
332  
333  
334  
335  
336  
337  
338  
339  
340  
341  
342  
343  
344  
345  
346  
347  
348  
349  
350  
351  
352  
353  
354  
355  
356  
357  
358  
359  
360  
361  
362  
363  
364  
365  
366  
367  
368  
369  
370  
371  
372  
373  
374  
375  
376  
377  
378  
379  
380  
381  
382  
383  
384  
385  
386  
387  
388  
389  
390  
391  
392  
393  
394  
395  
396  
397  
398  
399  
400  
401  
402  
403  
404  
405  
406  
407  
408  
409  
410  
411  
412  
413  
414  
415  
416  
417  
418  
419  
420  
421  
422  
423  
424  
425  
426  
427  
428  
429  
430  
431  
432  
433  
434  
435  
436  
437  
438  
439  
440  
441  
442  
443  
444  
445  
446  
447  
448  
449  
450  
451  
452  
453  
454  
455  
456  
457  
458  
459  
460  
461  
462  
463  
464  
465  
466  
467  
468  
469  
470  
471  
472  
473  
474  
475  
476  
477  
478  
479  
480  
481  
482  
483  
484  
485  
486  
487  
488  
489  
490  
491  
492  
493  
494  
495  
496  
497  
498  
499  
500  
501  
502  
503  
504  
505  
506  
507  
508  
509  
510  
511  
512  
513  
514  
515  
516  
517  
518  
519  
520  
521  
522  
523  
524  
525  
526  
527  
528  
529  
530  
531  
532  
533  
534  
535  
536  
537  
538  
539  
540  
541  
542  
543  
544  
545  
546  
547  
548  
549  
550  
551  
552  
553  
554  
555  
556  
557  
558  
559  
560  
561  
562  
563  
564  
565  
566  
567  
568  
569  
570  
571  
572  
573  
574  
575  
576  
577  
578  
579  
580  
581  
582  
583  
584  
585  
586  
587  
588  
589  
590  
591  
592  
593  
594  
595  
596  
597  
598  
599  
600  
601  
602  
603  
604  
605  
606  
607  
608  
609  
610  
611  
612  
613  
614  
615  
616  
617  
618  
619  
620  
621  
622  
623  
624  
625  
626  
627  
628  
629  
630  
631  
632  
633  
634  
635  
636  
637  
638  
639  
640  
641  
642  
643  
644  
645  
646  
647  
648  
649  
650  
651  
652  
653  
654  
655  
656  
657  
658  
659  
660  
661  
662  
663  
664  
665  
666  
667  
668  
669  
670  
671  
672  
673  
674  
675  
676  
677  
678  
679  
680  
681  
682  
683  
684  
685  
686  
687  
688  
689  
690  
691  
692  
693  
694  
695  
696  
697  
698  
699  
700  
701  
702  
703  
704  
705  
706  
707  
708  
709  
710  
711  
712  
713  
714  
715  
716  
717  
718  
719  
720  
721  
722  
723  
724  
725  
726  
727  
728  
729  
730  
731  
732  
733  
734  
735  
736  
737  
738  
739  
740  
741  
742  
743  
744  
745  
746  
747  
748  
749  
750  
751  
752  
753  
754  
755  
756  
757  
758  
759  
760  
761  
762  
763  
764  
765  
766  
767  
768  
769  
770  
771  
772  
773  
774  
775  
776  
777  
778  
779  
780  
781  
782  
783  
784  
785  
786  
787  
788  
789  
790  
791  
792  
793  
794  
795  
796  
797  
798  
799  
800  
801  
802  
803  
804  
805  
806  
807  
808  
809  
810  
811  
812  
813  
814  
815  
816  
817  
818  
819  
820  
821  
822  
823  
824  
825  
826  
827  
828  
829  
830  
831  
832  
833  
834  
835  
836  
837  
838  
839  
840  
841  
842  
843  
844  
845  
846  
847  
848  
849  
850  
851  
852  
853  
854  
855  
856  
857  
858  
859  
860  
861  
862  
863  
864  
865  
866  
867  
868  
869  
870  
871  
872  
873  
874  
875  
876  
877  
878  
879  
880  
881  
882  
883  
884  
885  
886  
887  
888  
889  
890  
891  
892  
893  
894  
895  
896  
897  
898  
899  
900  
901  
902  
903  
904  
905  
906  
907  
908  
909  
910  
911  
912  
913  
914  
915  
916  
917  
918  
919  
920  
921  
922  
923  
924  
925  
926  
927  
928  
929  
930  
931  
932  
933  
934  
935  
936  
937  
938  
939  
940  
941  
942  
943  
944  
945  
946  
947  
948  
949  
950  
951  
952  
953  
954  
955  
956  
957  
958  
959  
960  
961  
962  
963  
964  
965  
966  
967  
968  
969  
970  
971  
972  
973  
974  
975  
976  
977  
978  
979  
980  
981  
982  
983  
984  
985  
986  
987  
988  
989  
990  
991  
992  
993  
994  
995  
996  
997  
998  
999  
1000

Inherent to studies of this design (non-interventional), the lack of randomization, as well as the absence of a placebo-controlled group, means that confirmatory conclusions cannot be drawn. Moreover, the *a priori* defined duration of effect criteria was based on subject assessment of the waning of treatment effect. Thus, the subjective nature of this assessment has potential for bias resulting from patients' unrealistically high expectations from treatment; a hypothesis supported by the observation of maintained improvements in TWSTRS scores even at Visit 3.

## CONCLUSIONS

This study reveals the CD subject demographics and BoNT-A response in a real-life clinical setting. Using a novel multimodal definition of response, this large-scale study showed that

1  
2  
3 the magnitude of effect, subject satisfaction and safety profile were well met and it was also  
4 felt that these were appropriate measures to assess BoNT-A response in CD subjects. This  
5 study also indicates possible predictive factors for BoNT-A in subjects with CD, but further  
6 research is required to confirm these in the prognosis of CD.  
7  
8  
9

10  
11 **Acknowledgments:** The authors would like to acknowledge the editorial assistance of  
12 Ogilvy Healthworld. Funding was provided by Ipsen.  
13  
14

15  
16 The authors would also like to thank members of the INTEREST IN CD study group, who  
17 were:  
18

19 Australia: Dr A Hughes, Dr K Kotschet, Dr D Williams, Dr V Fung; Belgium: Dr M van  
20 Zandijcke, Dr P Santens, Dr W van Landegem, Dr V Delvaux; Czech Rep: Dr E Ehler, Dr R  
21 Jech, Dr P Otruba, Dr M Bareš; France: Dr M Simonetta-Moreau, Dr S Soulayrol, Dr P M  
22 Burbaud, Dr A Kreisler, Dr C Vial, Dr M Borg, Dr S Sangla, Dr N Patte-Karsenti; Germany: Dr  
23 E Fleischer, Dr M Müngersdorf, Dr I Weimar, Dr R Pfister, Dr B Mohammadi, Dr I Nastos;  
24 Netherlands: Dr Laboyrie, Dr Douma; Portugal: Dr M J Rosas, Dr J Ferreira, Dr M Castelo  
25 Branco; Russia: Dr S Timerbaeva, Dr D Khasanova, Dr L Korenko, Dr G Belskaya;  
26 UK: Dr P Moore, Dr M Kellet, Dr P Misra, Dr T Harrower.  
27  
28  
29  
30  
31  
32  
33

#### 34 **Competing interests**

35 *Vijay P. Misra*

36 Consultancies: *Ad hoc* consultant to Ipsen Pharma and Syntaxin Ltd..

37 Advisory Boards: Attended Ipsen Pharma Medical Advisory Boards.

38 Contracts: Contracts with Ipsen Pharma and Syntaxin Ltd. related to *ad hoc*

39 Consultancies/Advisory boards.  
40  
41  
42  
43  
44

45 *Edvard Ehler*

46 Grants: IGA Ministry of Health, Czech Republic.  
47  
48  
49

50 *Benjamin Zakine and Pascal Maisonobe*

51 Employment: Ipsen.  
52  
53  
54

55 *Marion Simonetta-Moreau*

56 Consultancies: Ipsen.

57 Employment: Hôpitaux de Toulouse and Paul Sabatier University.  
58  
59  
60

**Funding statement** For peer review only - <http://bmjopen.bmj.com/site/about/guidelines.xhtml>

1  
2  
3 This study was supported by Ipsen Pharma; employees (Benjamin Zakine and Pascal  
4 Maisonobe) of whom were involved in the design of the study and the subsequent  
5 preparation of this manuscript (writing and review).  
6  
7  
8

### 9 **Contributor statement**

10  
11 Vijay P. Misra was involved in the concept and design, provision of study materials or  
12 patients, collection and assembly of data, data analysis and interpretation, manuscript review  
13 and critique, and final approval of manuscript.  
14  
15

16  
17 Edvard Ehler was involved in the provision of study materials or patients, collection and  
18 assembly of data, manuscript review and critique, and final approval of manuscript.  
19

20  
21 Benjamin Zakine was involved in the concept and design, data analysis and interpretation,  
22 manuscript writing, manuscript review and critique, and final approval of manuscript.  
23  
24

25  
26 Pascal Maisonobe was involved in the concept and design, data analysis and interpretation,  
27 manuscript writing, manuscript review and critique, and final approval of manuscript.  
28

29  
30 Marion Simonetta-Moreau was involved in the concept and design, provision of study  
31 materials or patients, manuscript review and critique, and final approval of manuscript.  
32  
33  
34  
35  
36  
37  
38  
39  
40  
41  
42  
43  
44  
45  
46  
47  
48  
49  
50  
51  
52  
53  
54  
55  
56  
57  
58  
59  
60



## References

1. Bhidayasiri R, Tarsy D. Treatment of dystonia. *Expert Rev Neurother* 2006;6:863-86.
2. Nutt JG, Muenter MD, Aronson A, et al. Epidemiology of focal and generalized dystonia in Rochester, Minnesota. *Mov Disord* 1988;3:188-94.
3. Velickovic M, Benabou R, Brin MF. Cervical dystonia pathophysiology and treatment options. *Drugs* 2001;61:1921-43.
4. Jankovic J, Leder S, Warner D, et al. Cervical dystonia: clinical findings and associated movement disorders. *Neurology* 1991;41:1088-91.
5. Albanese A, Asmus F, Bhatia KP, et al. EFNS guidelines on diagnosis and treatment of primary dystonias. *Eur J Neurol* 2010;18:5-18.
6. Costa J, Espirito-Santo C, Borges A, et al. Botulinum toxin type A therapy for cervical dystonia. *Cochrane Database Syst Rev* 2005:CD003633.
7. Brashear A. Botulinum toxin type A in the treatment of patients with cervical dystonia. *Biologics* 2009;3:1-7.
8. Simpson DM, Blitzer A, Brashear A, et al. Assessment: Botulinum neurotoxin for the treatment of movement disorders (an evidence-based review): report of the Therapeutics and Technology Assessment Subcommittee of the American Academy of Neurology. *Neurology* 2008;70:1699-706.
9. Truong D, Duane DD, Jankovic J, et al. Efficacy and safety of botulinum type A toxin (Dysport) in cervical dystonia: results of the first US randomized, double-blind, placebo-controlled study. *Mov Disord* 2005;20:783-91.
10. Costa J, Espirito-Santo C, Borges A, et al. Botulinum toxin type B for cervical dystonia. *Cochrane Database Syst Rev* 2005;1:CD004315.
11. Consky ES, Lang AE. Clinical assessments of patients with cervical dystonia. In: Jankovic J, Hallett M, eds. *Therapy with botulinum toxin*. New York: M. Dekker 1994:211-37.

12. Tsui JK, Eisen A, Stoessl AJ, et al. Double-blind study of botulinum toxin in spasmodic torticollis. *Lancet* 1986;2:245–7.
13. Cano SJ, Hobart JC, Edwards M, et al. CDIP-58 can measure the impact of botulinum toxin treatment in cervical dystonia. *Neurology* 2006;67:2230–2.
14. Ranoux D, Gury C, Fondarai J, et al. Respective potencies of Botox and Dysport: a double blind, randomised, crossover study in cervical dystonia. *J Neurol Neurosurg Psychiatry* 2002;72:459–62.
15. Stacy M. Epidemiology, clinical presentation, and diagnosis of cervical dystonia. *Neurol Clin* 2008;26 Suppl 1:23–42.
16. Hefter H, Kupsch A, Müngersdorf M, et al; Dysport CervicalDystonia Study Group. A botulinum toxin A treatment algorithm for de novomanagement of torticollis and laterocollis. *BMJ Open* 2011;1:e000196.
17. Mohammadi B, Buhr N, Bigalke H, et al. A long-term follow-up of botulinum toxin A in cervical dystonia. *Neurol Res* 2009;31:463–6.
18. Vivancos-Matellano F, Ybot-Gorriñ I, Diez-Tejedor E. A 17-year experience of abobotulinumtoxinA in cervical dystonia. *Int J Neurosci* 2012 [Epub ahead of print].
19. Truong D, Comella C, Fernandez HH, et al. Efficacy and safety of purified botulinum toxin type A (Dysport) for the treatment of benign essential blepharospasm: a randomized, placebo-controlled, phase II trial. *Parkinsonism Relat Disord* 2008;14:407–14.
20. Truong D, Brodsky M, Lew M, et al. Long-term efficacy and safety of botulinum toxin type A (Dysport) in cervical dystonia. *Parkinsonism Relat Disord* 2010;16:316–23.
21. Slawek J, Friedman A, Potulska A, et al. Factors affecting the health-related quality of life of patients with cervical dystonia and the impact of botulinum toxin type A injections. *Funct Neurol* 2007;22:95–100.
22. Skogseid IM, Malt UF, Roislien J, et al. Determinants and status of quality of life after long-term botulinum toxin therapy for cervical dystonia. *Eur J Neurol* 2007;14:1129–37.

Figures

Figure 1: Responder analysis

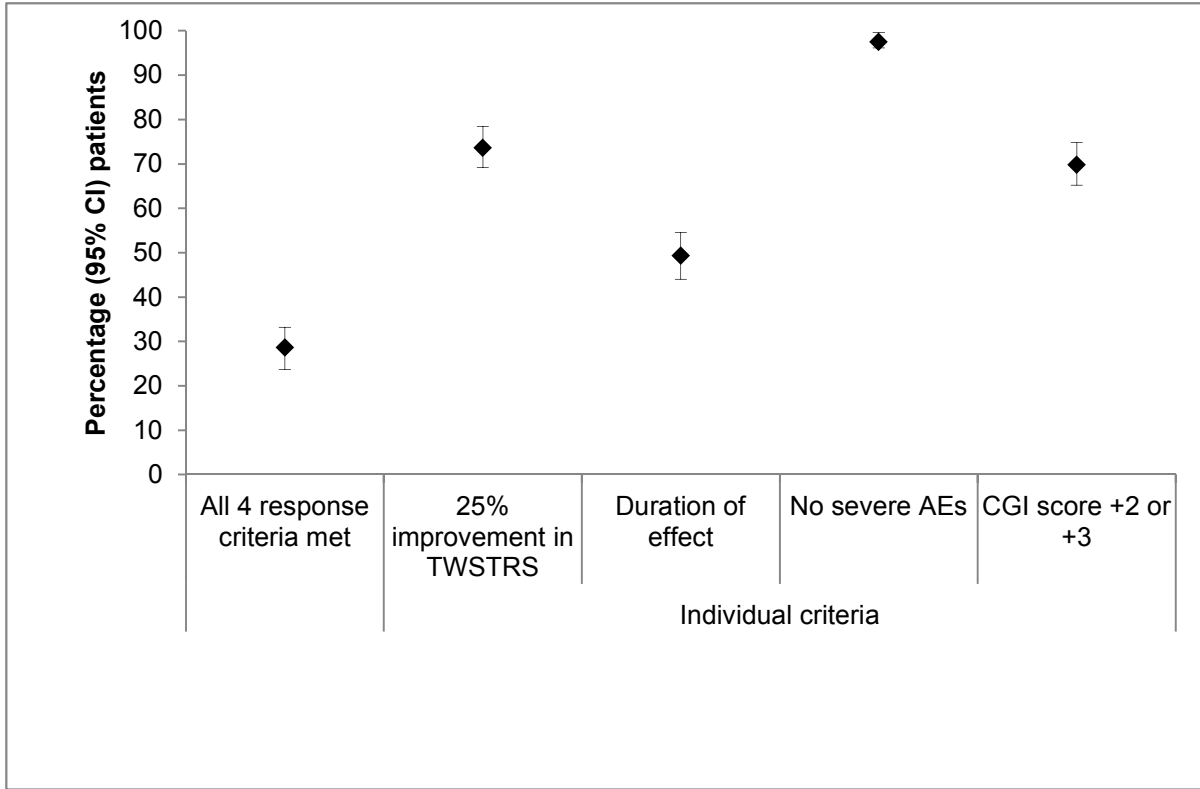

CI=confidence interval; TWSTRS=Toronto Western Spasmodic Torticollis Rating Scale; AEs=adverse events; CGI=clinical global improvement.

Figure 2: Subgroup analyses of responders (efficacy population)

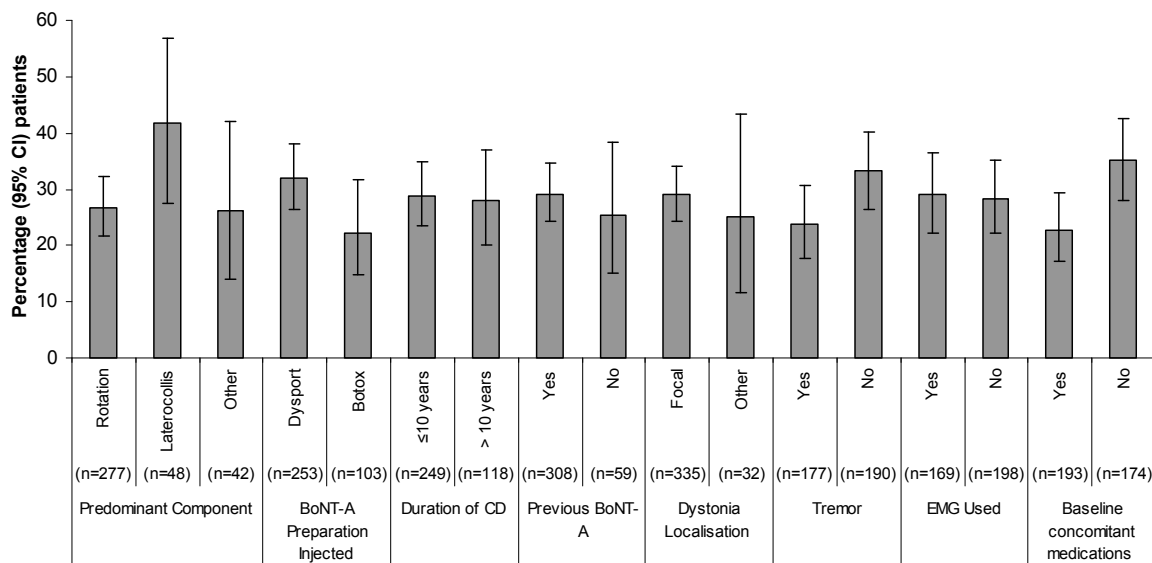

CI=confidence interval; CD=cervical dystonia; EMG = Electromyography; BoNT-A=Botulinum toxin A.

Figure 3: Occurrence of adverse events with frequently used BoNT-A preparation

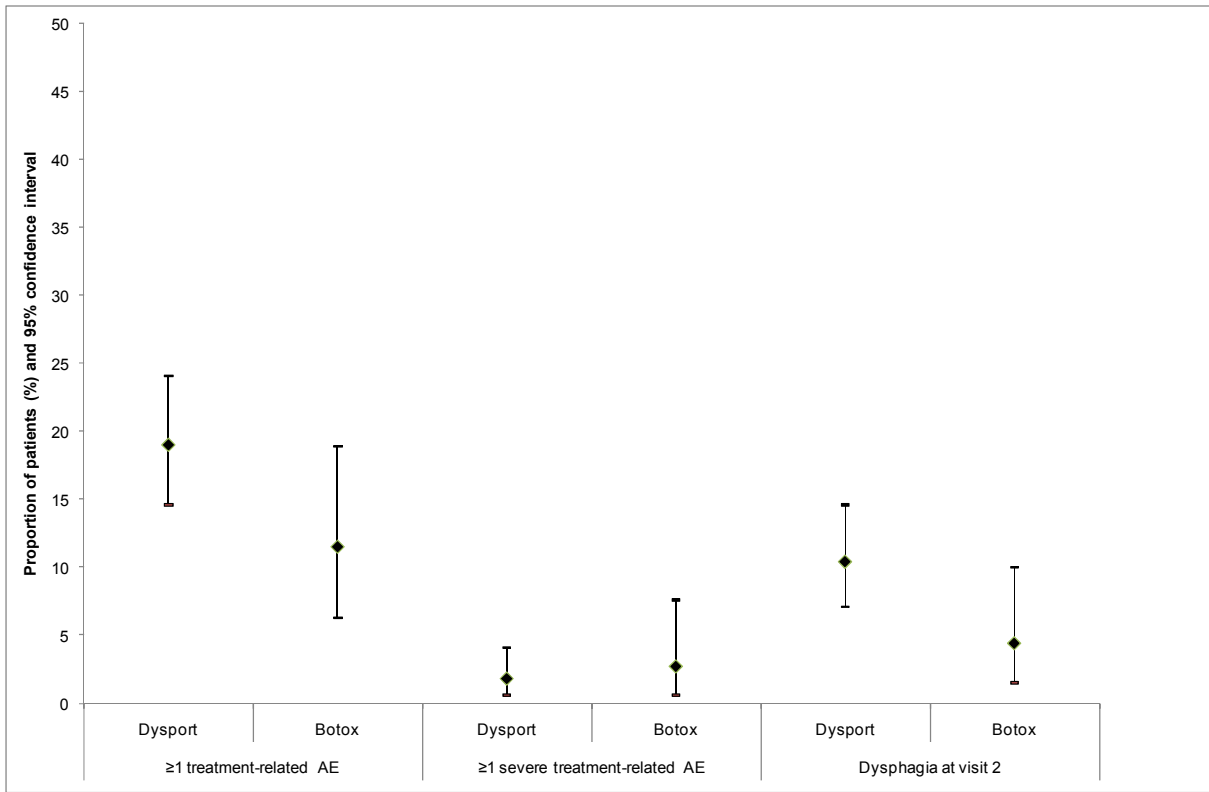

BoNT-A=Botulinum toxin A; AE=adverse event.

view only

1  
2  
3  
4  
5  
6  
7  
8  
9  
10  
11  
12  
13  
14  
15  
16  
17  
18  
19  
20  
21  
22  
23  
24  
25  
26  
27  
28  
29  
30  
31  
32  
33  
34  
35  
36  
37  
38  
39  
40  
41  
42  
43  
44  
45  
46  
47  
48  
49  
50  
51  
52  
53  
54  
55  
56  
57  
58  
59  
60

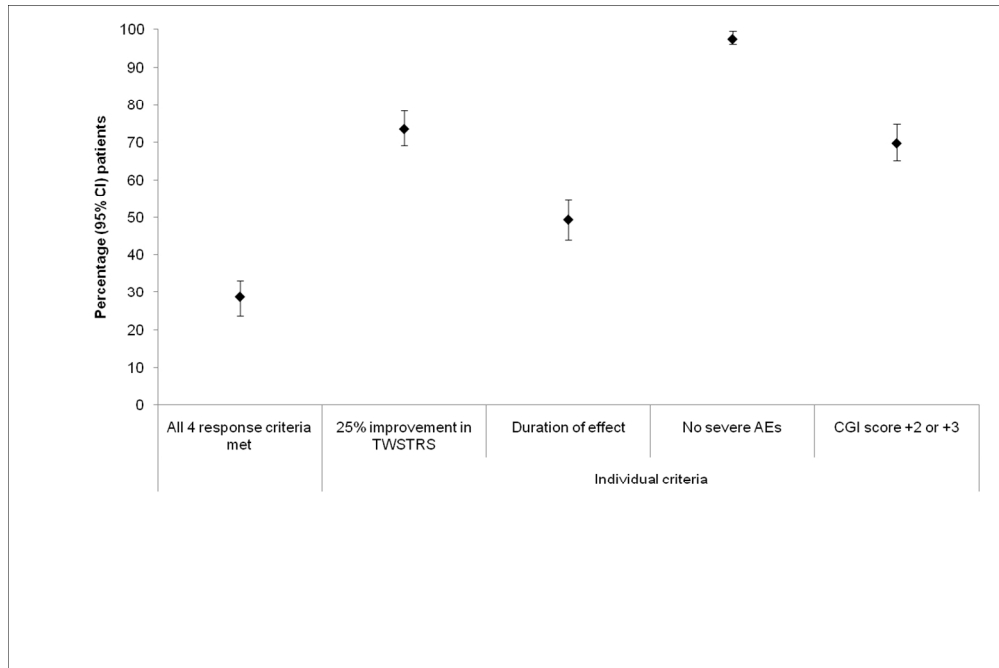

Responder analysis  
237x158mm (150 x 150 DPI)

Review only

1  
2  
3  
4  
5  
6  
7  
8  
9  
10  
11  
12  
13  
14  
15  
16  
17  
18  
19  
20  
21  
22  
23  
24  
25  
26  
27  
28  
29  
30  
31  
32  
33  
34  
35  
36  
37  
38  
39  
40  
41  
42  
43  
44  
45  
46  
47  
48  
49  
50  
51  
52  
53  
54  
55  
56  
57  
58  
59  
60

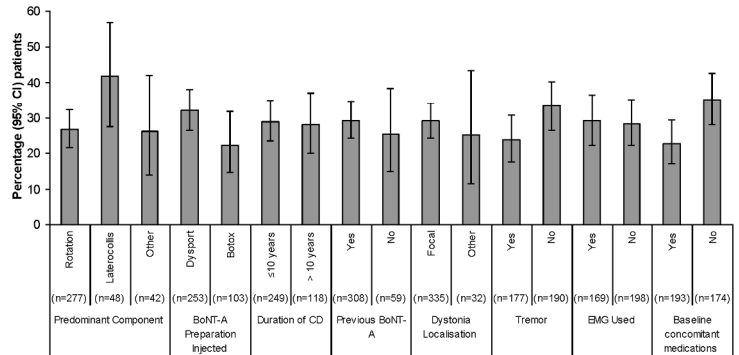

Subgroup analyses of responders (efficacy population)  
297x210mm (200 x 200 DPI)

view only

1  
2  
3  
4  
5  
6  
7  
8  
9  
10  
11  
12  
13  
14  
15  
16  
17  
18  
19  
20  
21  
22  
23  
24  
25  
26  
27  
28  
29  
30  
31  
32  
33  
34  
35  
36  
37  
38  
39  
40  
41  
42  
43  
44  
45  
46  
47  
48  
49  
50  
51  
52  
53  
54  
55  
56  
57  
58  
59  
60



Occurrence of adverse events with frequently used BoNT-A preparation  
297x210mm (200 x 200 DPI)

view only



STROBE Statement—Checklist of items that should be included in reports of *cohort studies*

|                              | Item No | Recommendation                                                                                                                                                                                                                                                                                                                                                                                                                                                           |
|------------------------------|---------|--------------------------------------------------------------------------------------------------------------------------------------------------------------------------------------------------------------------------------------------------------------------------------------------------------------------------------------------------------------------------------------------------------------------------------------------------------------------------|
| <b>Title and abstract</b>    | 1       | (a) Indicate the study's design with a commonly used term in the title or the abstract<br><u>- yes</u><br>(b) Provide in the abstract an informative and balanced summary of what was done and what was found- <u>yes</u>                                                                                                                                                                                                                                                |
| <b>Introduction</b>          |         |                                                                                                                                                                                                                                                                                                                                                                                                                                                                          |
| Background/rationale         | 2       | Explain the scientific background and rationale for the investigation being reported- <u>yes</u>                                                                                                                                                                                                                                                                                                                                                                         |
| Objectives                   | 3       | State specific objectives, including any prespecified hypotheses - <u>yes</u>                                                                                                                                                                                                                                                                                                                                                                                            |
| <b>Methods</b>               |         |                                                                                                                                                                                                                                                                                                                                                                                                                                                                          |
| Study design                 | 4       | Present key elements of study design early in the paper- <u>yes</u>                                                                                                                                                                                                                                                                                                                                                                                                      |
| Setting                      | 5       | Describe the setting, locations, and relevant dates, including periods of recruitment, exposure, follow-up, and data collection- <u>yes</u>                                                                                                                                                                                                                                                                                                                              |
| Participants                 | 6       | (a) Give the eligibility criteria, and the sources and methods of selection of participants. Describe methods of follow-up- <u>yes</u><br>(b) For matched studies, give matching criteria and number of exposed and unexposed                                                                                                                                                                                                                                            |
| Variables                    | 7       | Clearly define all outcomes, exposures, predictors, potential confounders, and effect modifiers. Give diagnostic criteria, if applicable - <u>these data are not relevant</u>                                                                                                                                                                                                                                                                                            |
| Data sources/<br>measurement | 8*      | For each variable of interest, give sources of data and details of methods of assessment (measurement). Describe comparability of assessment methods if there is more than one group - <u>NA</u>                                                                                                                                                                                                                                                                         |
| Bias                         | 9       | Describe any efforts to address potential sources of bias - <u>yes</u>                                                                                                                                                                                                                                                                                                                                                                                                   |
| Study size                   | 10      | Explain how the study size was arrived at – was there a sample size calculation? <u>Yes</u>                                                                                                                                                                                                                                                                                                                                                                              |
| Quantitative variables       | 11      | Explain how quantitative variables were handled in the analyses. If applicable, describe which groupings were chosen and why                                                                                                                                                                                                                                                                                                                                             |
| Statistical methods          | 12      | (a) Describe all statistical methods, including those used to control for confounding- <u>No control for confounding factors</u><br>(b) Describe any methods used to examine subgroups and interactions<br>(c) Explain how missing data were addressed <u>Missing data handling was addressed in the SAP (no estimation was made)</u><br>(d) If applicable, explain how loss to follow-up was addressed - <u>NA</u><br>(e) Describe any sensitivity analyses - <u>NA</u> |
| <b>Results</b>               |         |                                                                                                                                                                                                                                                                                                                                                                                                                                                                          |
| Participants                 | 13*     | (a) Report numbers of individuals at each stage of study—eg numbers potentially eligible, examined for eligibility, confirmed eligible, included in the study, completing follow-up, and analysed - <u>yes</u><br>(b) Give reasons for non-participation at each stage - <u>NA</u><br>(c) Consider use of a flow diagram - <u>NA</u>                                                                                                                                     |
| Descriptive data             | 14*     | (a) Give characteristics of study participants (eg demographic, clinical, social) and information on exposures and potential confounders - <u>yes</u><br>(b) Indicate number of participants with missing data for each variable of interest - <u>yes</u><br>(c) Summarise follow-up time (eg, average and total amount) - <u>NA</u>                                                                                                                                     |
| Outcome data                 | 15*     | Report numbers of outcome events or summary measures over time - <u>YES</u>                                                                                                                                                                                                                                                                                                                                                                                              |

|                                           |                |    |                                                                                                                                                                                                                                             |
|-------------------------------------------|----------------|----|---------------------------------------------------------------------------------------------------------------------------------------------------------------------------------------------------------------------------------------------|
| 1<br>2<br>3<br>4<br>5<br>6<br>7<br>8<br>9 | Main results   | 16 | (a) Give unadjusted estimates and, if applicable, confounder-adjusted estimates and their precision (eg, 95% confidence interval). Make clear which confounders were adjusted for and why they were included - <a href="#">Not relevant</a> |
| 10<br>11                                  | Other analyses | 17 | Report other analyses done—eg analyses of subgroups and interactions, and sensitivity analyses- <a href="#">Not relevant</a>                                                                                                                |

### Discussion

|                      |                  |    |                                                                                                                                                                                                  |
|----------------------|------------------|----|--------------------------------------------------------------------------------------------------------------------------------------------------------------------------------------------------|
| 12<br>13             | Key results      | 18 | Summarise key results with reference to study objectives - <a href="#">yes</a>                                                                                                                   |
| 14<br>15<br>16       | Limitations      | 19 | Discuss limitations of the study, taking into account sources of potential bias or imprecision. Discuss both direction and magnitude of any potential bias - <a href="#">yes</a>                 |
| 17<br>18<br>19<br>20 | Interpretation   | 20 | Give a cautious overall interpretation of results considering objectives, limitations, multiplicity of analyses, results from similar studies, and other relevant evidence - <a href="#">yes</a> |
| 21                   | Generalisability | 21 | Discuss the generalisability (external validity) of the study results - <a href="#">yes</a>                                                                                                      |

### Other information

|                            |         |    |                                                                                                                                                                                     |
|----------------------------|---------|----|-------------------------------------------------------------------------------------------------------------------------------------------------------------------------------------|
| 22<br>23<br>24<br>25<br>26 | Funding | 22 | Give the source of funding and the role of the funders for the present study and, if applicable, for the original study on which the present article is based - <a href="#">yes</a> |
|----------------------------|---------|----|-------------------------------------------------------------------------------------------------------------------------------------------------------------------------------------|

\*Give information separately for exposed and unexposed groups.

**Note:** An Explanation and Elaboration article discusses each checklist item and gives methodological background and published examples of transparent reporting. The STROBE checklist is best used in conjunction with this article (freely available on the Web sites of PLoS Medicine at <http://www.plosmedicine.org/>, Annals of Internal Medicine at <http://www.annals.org/>, and Epidemiology at <http://www.epidem.com/>). Information on the STROBE Initiative is available at <http://www.strobe-statement.org>.
